# Supplementary material
Source: publisher figshare collection journal article supplement (https://acs.figshare.com/ndownloader/files/8698624)

# ***Rhodium(III)-Catalyzed Selective C-H Acetoxylation and Hydroxylation Reactions***

*Yunxiang Wu,<sup>[a,b,]</sup> Bing Zhou<sup>[a,b, \*]</sup>*

<sup>a</sup> State Key Laboratory of Drug Research, Shanghai Institute of Materia Medica, Chinese Academy of Sciences, 555 Zu Chong Zhi Road, Shanghai 201203, PR China

<sup>b</sup> University of Chinese Academy of Sciences, No. 19A Yuquan Road, Beijing, 100049, China

E-mail: zhoubing@simma.ac.cn; zhoubing2012@hotmail.com

## ***Table of contents:***

|                                                                  |    |
|------------------------------------------------------------------|----|
| General Methods and Materials.....                               | 2  |
| Experimental Procedures and Characterizations.....               | 2  |
| <sup>1</sup> H and <sup>13</sup> C NMR Spectra of Compounds..... | 17 |

### General methods:

$^1\text{H}$  NMR (400 or 300 MHz) and  $^{13}\text{C}$  NMR (125, 100 MHz) spectra were determined with  $\text{CDCl}_3$  as solvent and tetramethylsilane (TMS) as internal standard. Chemical shifts were reported in ppm from internal TMS ( $\delta$ ). All coupling constants ( $J$  values) were reported in hertz (Hz). High-resolution mass spectra were recorded using the EI method with a double focusing magnetic mass analyzer. Reactions were monitored by thin-layer chromatography or LC-MS analysis. Column chromatography (petroleum ether/ethyl acetate) was performed on silica gel (200-300 mesh).

### Materials:

All reagents were purchased from *adamas-beta* in China and used without further purification, unless otherwise indicated.  $[\text{Cp}^*\text{RhCl}_2]_2^{\text{S1}}$  was prepared according to the previously reported synthetic methods.

### General procedure for the synthesis of 2 (taking 2a as an example):

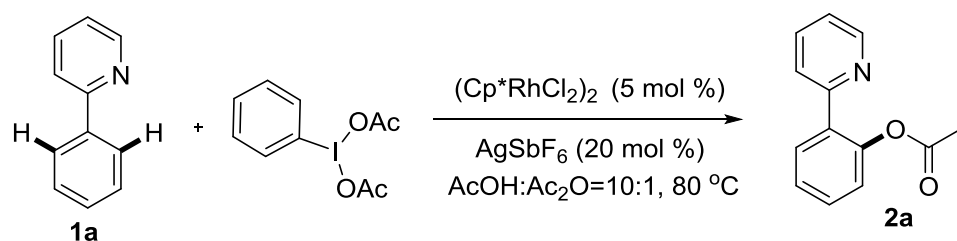

**1a** (0.2 mmol),  $\text{PhI}(\text{OAc})_2$  (0.24 mmol, 1.2 equiv),  $[\text{Cp}^*\text{RhCl}_2]_2$  (5 mol %),  $\text{AgSbF}_6$  (20 mol %),  $\text{AcOH}$  (2 mL) and  $\text{Ac}_2\text{O}$  (0.2 mL) were added to a test tube. The reaction mixture was stirred at  $80\text{ }^\circ\text{C}$  for 12 h. After that, the solvent was removed under reduced pressure and the residue was purified by silica gel chromatography using PE/EA (5:1) to afford the title compound **2a**.

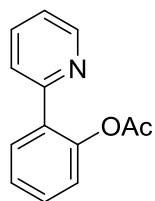

Compound **2a** was obtained as a white amorphous solid in 83% yield (35.4 mg),  $^1\text{H}$  NMR (400 MHz,  $\text{CDCl}_3$ )  $\delta$  8.70 (ddd,  $J = 4.9, 1.8, 0.9$  Hz, 1H), 7.77 – 7.67 (m, 2H), 7.54 (dt,  $J = 7.9, 1.0$  Hz, 1H), 7.43 (ddd,  $J = 8.0, 7.5, 1.8$  Hz, 1H), 7.35 (td,  $J = 7.5, 1.3$  Hz, 1H), 7.27 – 7.22 (m, 1H), 7.16 (dd,  $J = 8.0, 1.3$  Hz, 1H), 2.17 (s, 3H);  $^{13}\text{C}$  NMR (125 MHz,  $\text{CDCl}_3$ )  $\delta$  169.57, 155.97, 149.72, 148.21, 136.47, 133.23, 130.95, 129.88, 126.52, 123.81, 123.35, 122.36, 21.09; HRMS (EI) Calcd for  $\text{C}_{13}\text{H}_{11}\text{NO}_2$   $[\text{M}]^+$  213.0790, found 213.0793.

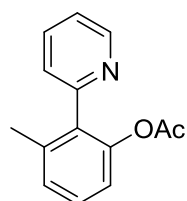

Compound **2b** was obtained as a white amorphous solid in 71% yield (32.3 mg),  $^1\text{H}$  NMR (300 MHz,  $\text{CDCl}_3$ )  $\delta$  8.71 (d,  $J = 5.1$  Hz, 1H), 7.73 (t,  $J = 7.7$  Hz, 1H), 7.36 – 7.15 (m, 4H), 6.98 (d,  $J = 7.8$  Hz, 1H), 2.15 (s, 3H), 1.95 (s, 3H);  $^{13}\text{C}$  NMR (125 MHz,  $\text{CDCl}_3$ )  $\delta$  170.26, 156.61, 150.28, 149.11, 138.91, 136.73, 134.34, 129.58, 128.74, 125.46, 122.82, 120.69, 21.28, 20.62; HRMS (EI) Calcd for  $\text{C}_{14}\text{H}_{13}\text{NO}_2$   $[\text{M}]^+$  227.0946, found 227.0949.

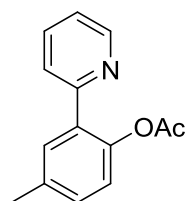

Compound **2c** was obtained as a white amorphous solid in 77% yield (35 mg),  $^1\text{H}$  NMR (300 MHz,  $\text{CDCl}_3$ )  $\delta$  8.70 (d,  $J = 4.6$  Hz, 1H), 7.73 (t,  $J = 7.7$  Hz, 1H), 7.57-7.50 (m, 2H), 7.26 – 7.18 (m, 2H), 7.04 (d,  $J = 8.3$  Hz, 1H), 2.40 (s, 3H), 2.17 (s, 3H);  $^{13}\text{C}$  NMR (125 MHz,  $\text{CDCl}_3$ )  $\delta$  170.37, 156.55, 150.26, 146.54, 136.95, 136.81,

133.36, 131.97, 131.06, 124.35, 123.59, 122.86, 21.67, 21.62; HRMS (EI) Calcd for  $C_{14}H_{13}NO_2$   $[M]^+$  227.0946, found 227.0941.

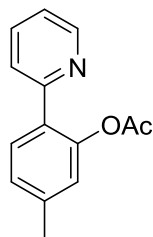

Compound **2d** was obtained as a white amorphous solid in 80% yield (36.4 mg),  $^1H$  NMR (300 MHz,  $CDCl_3$ )  $\delta$  8.68 (d,  $J$  = 4.4 Hz, 1H), 7.70 (q,  $J$  = 7.2 Hz, 1H), 7.59 (d,  $J$  = 7.8 Hz, 1H), 7.51 (d,  $J$  = 7.9 Hz, 1H), 7.25 – 7.13 (m, 2H), 6.97 (s, 1H), 2.40 (s, 3H), 2.18 (s, 3H);  $^{13}C$  NMR (125 MHz,  $CDCl_3$ )  $\delta$  169.57, 155.84, 149.47, 147.88, 140.19, 136.25, 130.52, 130.15, 127.25, 123.67, 123.46, 121.95, 21.14, 20.98; HRMS (EI) Calcd for  $C_{14}H_{13}NO_2$   $[M]^+$  227.0946, found 227.0944.

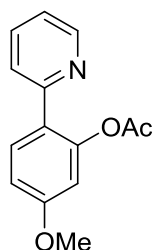

Compound **2e** was obtained as a white amorphous solid in 61% yield (29.7 mg),  $^1H$  NMR (300 MHz,  $CDCl_3$ )  $\delta$  8.66 (d,  $J$  = 4.2 Hz, 1H), 7.73-7.63 (m, 2H), 7.50 (d,  $J$  = 7.9 Hz, 1H), 7.24 – 7.14 (m, 1H), 6.90 (dd,  $J$  = 8.6, 2.1 Hz, 1H), 6.70 (d,  $J$  = 2.1 Hz, 1H), 3.84 (s, 3H), 2.19 (s, 3H);  $^{13}C$  NMR (125 MHz,  $CDCl_3$ )  $\delta$  169.48, 160.81, 155.84, 149.62, 149.15, 136.37, 131.61, 125.78, 123.36, 121.82, 112.51, 108.90, 55.70, 21.16; HRMS (EI) Calcd for  $C_{14}H_{13}NO_3$   $[M]^+$  243.0895, found 243.0893.

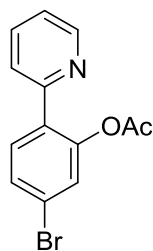

Compound **2f** was obtained as a yellow amorphous solid in 72% yield (42 mg),  $^1H$  NMR (300 MHz,  $CDCl_3$ )  $\delta$  8.69 (d,  $J$  = 4.1 Hz, 1H), 7.74 (t,  $J$  = 7.8 Hz, 1H), 7.60 (d,

$J = 8.3$  Hz, 1H), 7.55-7.46 (m, 2H), 7.35 (s, 1H), 7.26 (t,  $J = 6.2$  Hz, 1H), 2.18 (s, 3H);  $^{13}\text{C}$  NMR (125 MHz,  $\text{CDCl}_3$ )  $\delta$  169.10, 155.00, 149.86, 148.62, 136.55, 132.34, 132.04, 129.76, 126.74, 123.60, 122.78, 122.61, 21.01; HRMS (EI) Calcd for  $\text{C}_{13}\text{H}_{10}\text{BrNO}_2$   $[\text{M}]^+$  290.9895, found 290.9894.

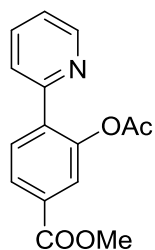

Compound **2g** was obtained as a white amorphous solid in 74% yield (40.1 mg),  $^1\text{H}$  NMR (300 MHz,  $\text{CDCl}_3$ )  $\delta$  8.73 (d,  $J = 4.2$  Hz, 1H), 8.02 (d,  $J = 8.1$  Hz, 1H), 7.87-7.72 (m, 3H), 7.58 (d,  $J = 7.9$  Hz, 1H), 7.35 – 7.27 (m, 1H), 3.94 (s, 3H), 2.20 (s, 3H);  $^{13}\text{C}$  NMR (125 MHz,  $\text{CDCl}_3$ )  $\delta$  169.31, 166.09, 154.96, 149.92, 148.12, 137.51, 136.59, 131.62, 131.08, 127.54, 124.83, 123.89, 122.94, 52.53, 21.05; HRMS (EI) Calcd for  $\text{C}_{15}\text{H}_{13}\text{NO}_4$   $[\text{M}]^+$  271.0845, found 271.0849.

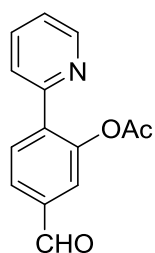

Compound **2h** was obtained as a white amorphous solid in 71% yield (34.3 mg),  $^1\text{H}$  NMR (300 MHz,  $\text{CDCl}_3$ )  $\delta$  10.05 (s, 1H), 8.73 (d,  $J = 4.7$  Hz, 1H), 7.91 – 7.74 (m, 3H), 7.69 (s, 1H), 7.60 (d,  $J = 7.9$  Hz, 1H), 7.35 – 7.28 (m, 1H), 2.19 (s,  $J = 14.7$  Hz, 3H);  $^{13}\text{C}$  NMR (125 MHz,  $\text{CDCl}_3$ )  $\delta$  190.98, 169.18, 154.68, 150.01, 148.81, 138.90, 137.54, 136.64, 131.84, 127.54, 124.46, 123.97, 123.15, 21.03; HRMS (EI) Calcd for  $\text{C}_{14}\text{H}_{11}\text{NO}_3$   $[\text{M}]^+$  241.0739, found 241.0733.

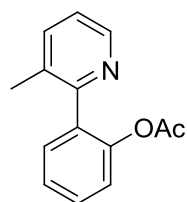

Compound **2i** was obtained as a white amorphous solid in 70% yield (31.8 mg),  $^1\text{H}$  NMR (300 MHz,  $\text{CDCl}_3$ )  $\delta$  8.50 (d,  $J = 4.3$  Hz, 1H), 7.58 (d,  $J = 7.6$  Hz, 1H), 7.47 – 7.27 (m, 3H), 7.22–7.12 (m, 2H), 2.21 (s, 3H), 1.97 (s, 3H);  $^{13}\text{C}$  NMR (150 MHz,  $\text{CDCl}_3$ )  $\delta$  169.05, 155.68, 148.28, 146.83, 138.06, 133.64, 132.35, 130.61, 129.40, 126.04, 122.86, 122.63, 20.76, 19.21; HRMS (EI) Calcd for  $\text{C}_{14}\text{H}_{13}\text{NO}_2$   $[\text{M}]^+$  227.0946, found 227.0948.

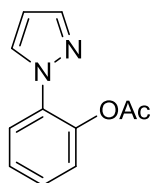

Compound **2j** was obtained as a yellow amorphous solid in 65% yield (26.2 mg),  $^1\text{H}$  NMR (300 MHz,  $\text{CDCl}_3$ )  $\delta$  7.83 – 7.71 (m, 2H), 7.67 – 7.58 (m, 1H), 7.42 – 7.31 (m, 2H), 7.22 (d,  $J = 9.3$  Hz, 1H), 6.44 (s, 1H), 2.21 (s, 3H);  $^{13}\text{C}$  NMR (125 MHz,  $\text{CDCl}_3$ )  $\delta$  168.88, 143.43, 141.15, 133.25, 130.28, 128.50, 126.93, 125.80, 124.11, 107.13, 20.89; HRMS (EI) Calcd for  $\text{C}_{11}\text{H}_{10}\text{N}_2\text{O}_2$   $[\text{M}]^+$  202.0742, found 202.0741.

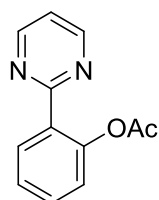

Compound **2k** was obtained as a white amorphous solid in 75% yield (32.1 mg),  $^1\text{H}$  NMR (300 MHz,  $\text{CDCl}_3$ )  $\delta$  8.81 (d,  $J = 4.8$  Hz, 2H), 8.23 (d,  $J = 7.6$  Hz, 1H), 7.51 (t,  $J = 7.3$  Hz, 1H), 7.39 (t,  $J = 7.4$  Hz, 1H), 7.25 – 7.14 (m, 2H), 2.31 (s, 3H);  $^{13}\text{C}$  NMR (150 MHz,  $\text{CDCl}_3$ )  $\delta$  170.24, 164.02, 157.10, 149.50, 131.76, 131.52, 130.62, 126.44, 124.05, 119.18, 21.29; HRMS (EI) Calcd for  $\text{C}_{12}\text{H}_{10}\text{N}_2\text{O}_2$   $[\text{M}]^+$  214.0742, found 214.0746.

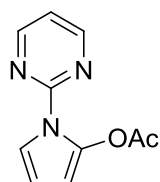

Compound **2l** was obtained as a yellow amorphous solid in 64% yield (26 mg),  $^1\text{H}$  NMR (300 MHz,  $\text{CDCl}_3$ )  $\delta$  8.69 (d,  $J = 4.8$  Hz, 2H), 7.47–7.43 (m, 1H), 7.17 (d,  $J =$

6.2 Hz, 1H), 7.08 (t,  $J = 4.9$  Hz, 1H), 6.36 (d,  $J = 6.0$  Hz, 1H), 2.07 (s, 3H);  $^{13}\text{C}$  NMR (125 MHz,  $\text{CDCl}_3$ )  $\delta$  170.09, 167.39, 158.47, 156.02, 143.22, 129.92, 117.18, 82.43, 20.93; HRMS (EI) Calcd for  $\text{C}_{10}\text{H}_9\text{N}_3\text{O}_2$   $[\text{M}]^+$  203.0695, found 203.0694.

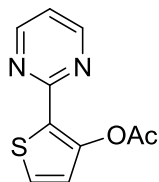

Compound **2m** was obtained as a white amorphous solid in 54% yield (23.8 mg),  $^1\text{H}$  NMR (300 MHz,  $\text{CDCl}_3$ )  $\delta$  8.70 (d,  $J = 4.6$  Hz, 2H), 7.44 (d,  $J = 5.4$  Hz, 1H), 7.11 (t,  $J = 5.1$  Hz, 1H), 6.94 (d,  $J = 5.2$  Hz, 1H), 2.42 (s, 3H);  $^{13}\text{C}$  NMR (125 MHz,  $\text{CDCl}_3$ )  $\delta$  169.26, 160.59, 156.95, 147.40, 127.93, 127.53, 124.40, 118.34, 21.10; HRMS (EI) Calcd for  $\text{C}_{10}\text{H}_8\text{N}_2\text{O}_2\text{S}$   $[\text{M}]^+$  220.0306, found 220.0307.

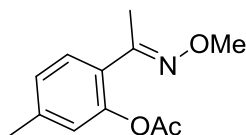

Compound **2n** was obtained as a white amorphous solid in 56% yield (24.8 mg),  $^1\text{H}$  NMR (300 MHz,  $\text{CDCl}_3$ )  $\delta$  7.32 (d,  $J = 7.9$  Hz, 1H), 7.06 (d,  $J = 7.4$  Hz, 1H), 6.91 (s, 1H), 3.95 (s, 3H), 2.35 (s, 3H), 2.28 (s, 3H), 2.14 (s, 3H);  $^{13}\text{C}$  NMR (125 MHz,  $\text{CDCl}_3$ )  $\delta$  171.29, 155.26, 149.66, 142.10, 131.06, 129.20, 128.79, 125.61, 63.76, 23.00, 16.88; HRMS (EI) Calcd for  $\text{C}_{12}\text{H}_{15}\text{NO}_3$   $[\text{M}]^+$  221.1052, found 221.1056.

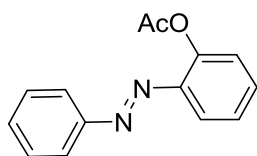

Compound **2o** was obtained as a red amorphous solid in 70% yield (33.6 mg),  $^1\text{H}$  NMR (400 MHz,  $\text{CDCl}_3$ )  $\delta$  7.90 – 7.84 (m, 2H), 7.84 – 7.81 (m, 1H), 7.54 – 7.48 (m, 4H), 7.35 (ddd,  $J = 8.1, 7.4, 1.4$  Hz, 1H), 7.27 – 7.24 (m, 1H), 2.40 (s, 3H);  $^{13}\text{C}$  NMR (125 MHz,  $\text{CDCl}_3$ )  $\delta$  169.72, 152.94, 149.07, 144.07, 132.19, 131.48, 129.22, 126.70, 123.45, 123.11, 117.77, 20.88; HRMS (EI) Calcd for  $\text{C}_{14}\text{H}_{12}\text{N}_2\text{O}_2$   $[\text{M}]^+$  240.0899, found 240.0894.

**General procedure for the synthesis of 3 (taking 3a as an example):**

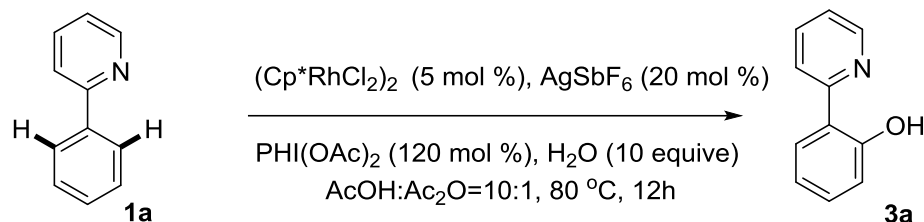

**1a** (0.2 mmol),  $\text{PhI}(\text{OAc})_2$  (0.24 mmol, 1.2 equiv),  $[\text{Cp}^*\text{RhCl}_2]_2$  (5 mol %),  $\text{AgSbF}_6$  (20 mol %),  $\text{H}_2\text{O}$  (2 mmol, 10 equiv),  $\text{AcOH}$  (2 mL) and  $\text{Ac}_2\text{O}$  (0.2 mL) were added to a test tube. The reaction mixture was stirred at  $80^\circ\text{C}$  for 12 h. After that, the solvent was removed under reduced pressure and the residue was purified by silica gel chromatography using PE/EA (5:1) to afford the title compound **3a**.

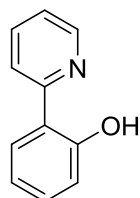

Compound **3a** was obtained as a yellow oil in 82% yield (28.1 mg),  $^1\text{H}$  NMR (400 MHz,  $\text{CDCl}_3$ )  $\delta$  8.51 (ddd,  $J = 5.0, 1.8, 0.9$  Hz, 1H), 7.92 (d,  $J = 8.3$  Hz, 1H), 7.86 – 7.78 (m, 2H), 7.34 – 7.28 (m, 1H), 7.26 – 7.22 (m, 1H), 7.04 (dd,  $J = 8.3, 1.2$  Hz, 1H), 6.94 – 6.88 (m, 1H);  $^{13}\text{C}$  NMR (125 MHz,  $\text{CDCl}_3$ )  $\delta$  160.04, 157.88, 145.82, 137.81, 131.53, 126.12, 121.52, 119.08, 118.79, 118.66; HRMS (EI) Calcd for  $\text{C}_{11}\text{H}_9\text{NO}$   $[\text{M}]^+$  171.0684, found 171.0685.

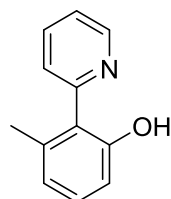

Compound **3b** was obtained as a yellow oil in 76% yield (28.2 mg),  $^1\text{H}$  NMR (300 MHz,  $\text{CDCl}_3$ )  $\delta$  8.63 (d,  $J = 4.4$  Hz, 1H), 7.84 (t,  $J = 7.9$  Hz, 1H), 7.60 (d,  $J = 8.2$  Hz, 1H), 7.28 (d,  $J = 9.2$  Hz, 1H), 7.19 (t,  $J = 7.8$  Hz, 1H), 6.90 (d,  $J = 8.3$  Hz, 1H), 6.83 (d,  $J = 7.6$  Hz, 1H), 2.50 (s, 3H);  $^{13}\text{C}$  NMR (125 MHz,  $\text{CDCl}_3$ )  $\delta$  157.62, 157.24, 147.39, 137.13, 136.36, 130.14, 125.85, 122.97, 122.38, 121.73, 115.38, 22.59;



HRMS (EI) Calcd for  $C_{12}H_{11}NO$   $[M]^+$  185.0841, found 185.0839.

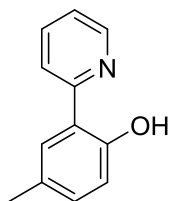

Compound **3c** was obtained as a yellow oil in 70% yield (25.9 mg),  $^1H$  NMR (300 MHz,  $CDCl_3$ )  $\delta$  14.10 (s, 1H), 8.51 (d,  $J = 4.2$  Hz, 1H), 7.92 (d,  $J = 8.3$  Hz, 1H), 7.82 (t,  $J = 7.9$  Hz, 1H), 7.60 (s, 1H), 7.26 – 7.18 (m, 1H), 7.12 (d,  $J = 8.2$  Hz, 1H), 6.93 (d,  $J = 8.3$  Hz, 1H), 2.34 (s, 3H);  $^{13}C$  NMR (125 MHz,  $CDCl_3$ )  $\delta$  158.37, 158.11, 146.32, 138.05, 132.72, 128.07, 126.68, 121.75, 119.39, 118.77, 21.15; HRMS (EI) Calcd for  $C_{12}H_{11}NO$   $[M]^+$  185.0841, found 185.0844.

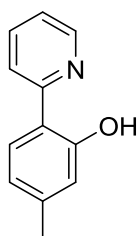

Compound **3d** was obtained as a yellow oil in 85% yield (31.5 mg),  $^1H$  NMR (300 MHz,  $CDCl_3$ )  $\delta$  14.34 (s, 1H), 8.48 (d,  $J = 4.6$  Hz, 1H), 7.91 – 7.75 (m, 2H), 7.68 (d,  $J = 7.9$  Hz, 1H), 7.23 – 7.16 (m, 1H), 6.85 (s, 1H), 6.73 (d,  $J = 7.9$  Hz, 1H), 2.35 (s, 3H);  $^{13}C$  NMR (125 MHz,  $CDCl_3$ )  $\delta$  160.06, 158.15, 145.93, 142.25, 137.77, 126.05, 121.19, 120.05, 119.03, 118.84, 116.37, 21.56; HRMS (EI) Calcd for  $C_{12}H_{11}NO$   $[M]^+$  185.0841, found 185.0845.

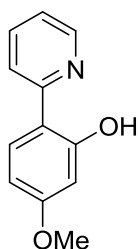

Compound **3e** was obtained as a white amorphous solid in 65% yield (26.2 mg),  $^1H$  NMR (300 MHz,  $CDCl_3$ )  $\delta$  14.71 (s, 1H), 8.46 (s, 1H), 7.80 (s, 2H), 7.70 (d,  $J = 8.7$  Hz, 1H), 7.22-7.17(m, 1H), 6.58 – 6.47 (m, 2H), 3.84 (s, 3H);  $^{13}C$  NMR (125 MHz,  $CDCl_3$ )  $\delta$  164.25, 163.81, 159.79, 147.46, 139.51, 129.02, 122.42, 120.14, 113.95, 108.51, 104.03, 57.23; HRMS (EI) Calcd for  $C_{12}H_{11}NO_2$   $[M]^+$  201.0790, found

201.0794.

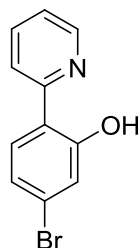

Compound **3f** was obtained as a yellow amorphous solid in 85% yield (42.5 mg),  $^1\text{H}$  NMR (300 MHz,  $\text{CDCl}_3$ )  $\delta$  14.65 (s, 1H), 8.50 (d,  $J = 4.9$  Hz, 1H), 7.90 – 7.81 (m, 2H), 7.64 (d,  $J = 8.5$  Hz, 1H), 7.30 – 7.25 (m, 1H), 7.20 (d,  $J = 1.7$  Hz, 1H), 7.03 (dd,  $J = 8.6, 1.9$  Hz, 1H);  $^{13}\text{C}$  NMR (125 MHz,  $\text{CDCl}_3$ )  $\delta$  160.97, 157.23, 145.97, 138.12, 127.26, 125.04, 122.09, 121.99, 121.79, 119.14, 117.88; HRMS (EI) Calcd for  $\text{C}_{11}\text{H}_8\text{BrNO}$   $[\text{M}]^+$  248.9789, found 248.9791.

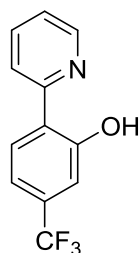

Compound **3g** was obtained as a white amorphous solid in 76% yield (36.4 mg),  $^1\text{H}$  NMR (300 MHz,  $\text{CDCl}_3$ )  $\delta$  14.61 (s, 1H), 8.56 (d,  $J = 5.2$  Hz, 1H), 8.01 – 7.85 (m, 3H), 7.40 – 7.30 (m, 1H), 7.27 (s, 1H), 7.14 (d,  $J = 7.9$  Hz, 1H);  $^{13}\text{C}$  NMR (125 MHz,  $\text{CDCl}_3$ )  $\delta$  160.09, 156.62, 146.05, 138.16, 133.14 (q,  $J = 32.5$  Hz), 126.61, 123.74 (d,  $J = 272.4$  Hz), 122.54, 121.50, 119.59, 115.85 (d,  $J = 3.9$  Hz), 115.07 (d,  $J = 3.7$  Hz); HRMS (EI) Calcd for  $\text{C}_{12}\text{H}_8\text{F}_3\text{NO}$   $[\text{M}]^+$  239.0558, found 239.0556.

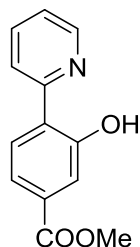

Compound **3h** was obtained as a white amorphous solid in 83% yield (38.1 mg),  $^1\text{H}$  NMR (300 MHz,  $\text{CDCl}_3$ )  $\delta$  14.42 (s, 1H), 8.56 (d,  $J = 4.6$  Hz, 1H), 8.01 – 7.83 (m, 3H), 7.69 (s, 1H), 7.57 (d,  $J = 8.3$  Hz, 1H), 7.31 (dd,  $J = 13.3, 7.2$  Hz, 1H), 3.93 (s,

3H);  $^{13}\text{C}$  NMR (150 MHz,  $\text{CDCl}_3$ )  $\delta$  166.71, 159.82, 156.87, 146.08, 138.06, 132.56, 126.11, 122.52, 122.47, 119.92, 119.81, 119.57, 52.27; HRMS (EI) Calcd for  $\text{C}_{13}\text{H}_{11}\text{NO}_3$   $[\text{M}]^+$  229.0739, found 229.0741.

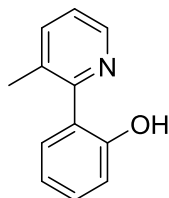

Compound **3i** was obtained as a yellow oil in 80% yield (29.6 mg),  $^1\text{H}$  NMR (300 MHz,  $\text{CDCl}_3$ )  $\delta$  14.40 (s, 1H), 8.55 (d,  $J$  = 5.0 Hz, 1H), 8.11 (dd,  $J$  = 22.4, 8.3 Hz, 1H), 7.97 (d,  $J$  = 7.8 Hz, 1H), 7.90-7.81 (m, 1H), 7.69 (s, 1H), 7.56 (d,  $J$  = 8.3 Hz, 1H), 7.36 – 7.28 (m, 1H);  $^{13}\text{C}$  NMR (125 MHz,  $\text{CDCl}_3$ )  $\delta$  159.41, 147.68, 141.33, 139.19, 131.53, 129.64, 128.85, 128.62, 122.78, 20.77; HRMS (EI) Calcd for  $\text{C}_{12}\text{H}_{11}\text{NO}$   $[\text{M}]^+$  185.0841, found 185.0845.

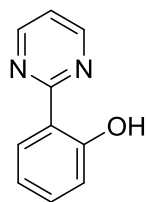

Compound **3j** was obtained as a yellow oil in 75% yield (25.8 mg),  $^1\text{H}$  NMR (300 MHz,  $\text{CDCl}_3$ )  $\delta$  13.06 (s, 1H), 8.79 (d,  $J$  = 4.9 Hz, 2H), 8.49 (d,  $J$  = 8.0 Hz, 1H), 7.40 (t,  $J$  = 7.8 Hz, 1H), 7.22 (t,  $J$  = 4.9 Hz, 1H), 7.03 (d,  $J$  = 8.3 Hz, 1H), 6.97 (t,  $J$  = 7.6 Hz, 1H);  $^{13}\text{C}$  NMR (125 MHz,  $\text{CDCl}_3$ )  $\delta$  165.97, 161.32, 156.82, 134.10, 129.85, 119.86, 119.41, 119.02, 118.73; HRMS (EI) Calcd for  $\text{C}_{10}\text{H}_8\text{N}_2\text{O}$   $[\text{M}]^+$  172.0637, found 172.0633.

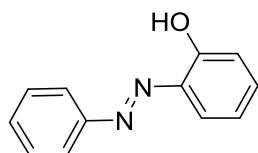

Compound **3k** was obtained as a red amorphous solid in 71% yield (28.2 mg),  $^1\text{H}$  NMR (300 MHz,  $\text{CDCl}_3$ )  $\delta$  12.95 (s, 1H), 7.98 (d,  $J$  = 7.9 Hz, 1H), 7.90 (d,  $J$  = 8.4 Hz, 2H), 7.60-7.48 (m, 3H), 7.38 (t,  $J$  = 7.9 Hz, 1H), 7.13-7.03 (m, 2H);  $^{13}\text{C}$  NMR (150 MHz,  $\text{CDCl}_3$ )  $\delta$  152.78, 150.54, 137.37, 133.31, 133.28, 131.20, 129.39, 122.27, 119.96, 118.22; HRMS (EI) Calcd for  $\text{C}_{12}\text{H}_{10}\text{N}_2\text{O}$   $[\text{M}]^+$  198.0793, found 198.0796.

### Scale-up of the reaction.

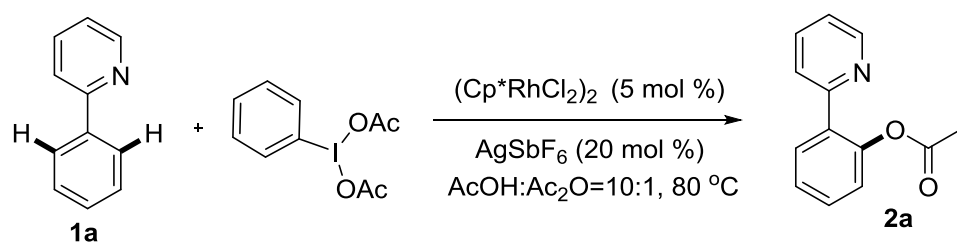

**1a** (5 mmol, 775 mg),  $\text{PhI}(\text{OAc})_2$  (6 mmol, 1.2 equiv, 1930 mg),  $[\text{Cp}^*\text{RhCl}_2]_2$  (5 mol %, 154 mg),  $\text{AgSbF}_6$  (20 mol %, 343mg),  $\text{AcOH}$  (50 mL) and  $\text{Ac}_2\text{O}$  (5 mL) were added to a 150 mL round-bottom flask. The reaction mixture was refluxed at  $80\text{ }^\circ\text{C}$  for 12 h. After that, the solvent was removed under reduced pressure and the residue was purified by silica gel chromatography using PE/EA (5:1) to afford the title compound **2a** 872 mg (yield 81.8%).

### Mechanistic study

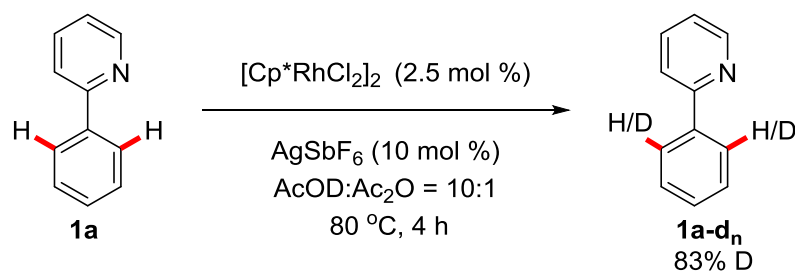

A mixture of **1a** (0.2 mmol),  $[\text{Cp}^*\text{RhCl}_2]_2$  (2.5 mol %),  $\text{AgSbF}_6$  (10 mol %), were dissolved in Acetic acid- $\text{d}_1$ : $\text{Ac}_2\text{O}$  (10:1) (2 mL) in a pressure tube. The reaction mixtures was stirred at  $80\text{ }^\circ\text{C}$  for overnight. The solvent was rapidly removed under reduced pressure and the residues of the reaction was purified by silica gel chromatography using EA/PE to afford the mixture of **1a** : **1a-d<sub>n</sub>** .

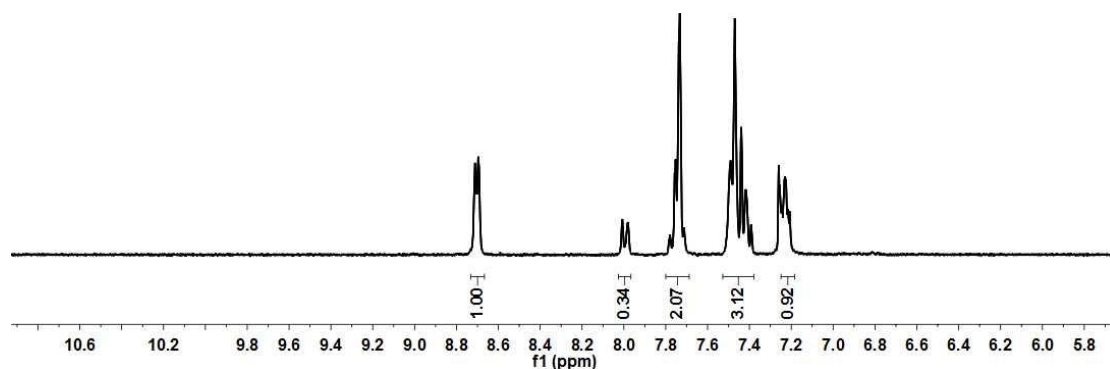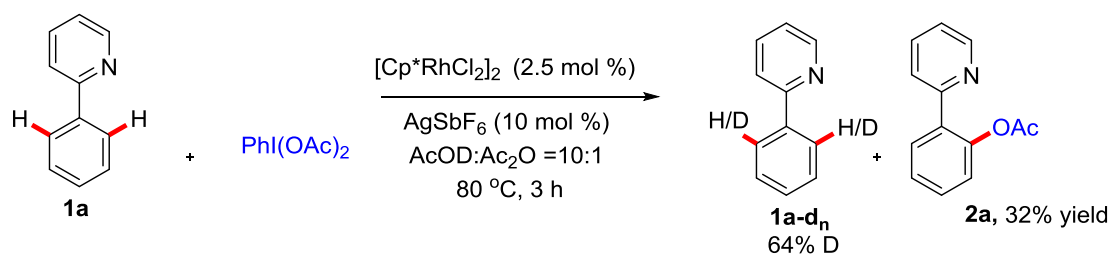

A mixture of **1a** (0.2 mmol),  $\text{PhI}(\text{OAc})_2$  (0.24 mmol),  $[\text{Cp}^*\text{RhCl}_2]_2$  (2.5 mol %),  $\text{AgSbF}_6$  (10 mol %), were dissolved in  $\text{AcOD}:\text{Ac}_2\text{O}$  (10:1) (2 mL) in a pressure tube, The reaction mixtures was stirred at 80 °C for 3 h. The solvent was rapidly removed under reduced pressure and the residues of the reaction was purified by silica gel chromatography using EA/PE to re-isolate **1a**.

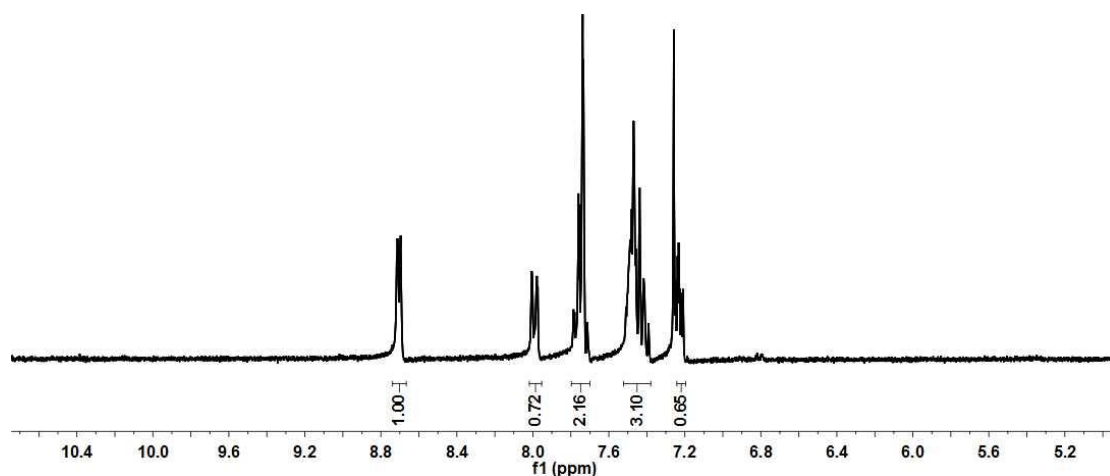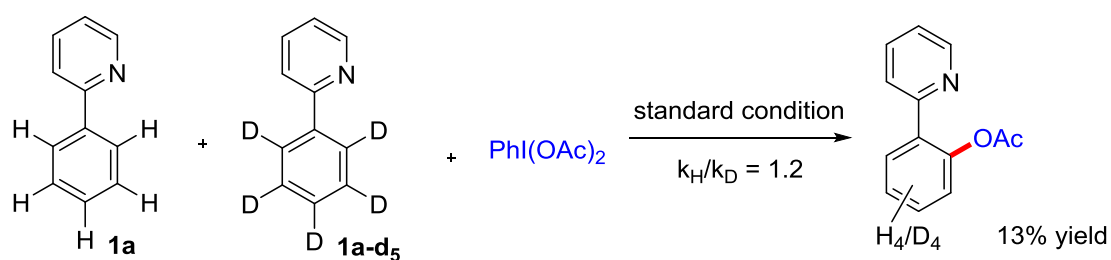

An equimolar mixture of **1a** (0.2 mmol, 31 mg), **1a-d<sub>5</sub>** (0.2 mmol, 32 mg), PhI(OAc)<sub>2</sub> (0.2 mmol, 64mg), [Cp<sup>\*</sup>RhCl<sub>2</sub>]<sub>2</sub> (2.5 mol %), AgSbF<sub>6</sub> (10 mol %), were dissolved in Acetic acid:Ac<sub>2</sub>O (10:1) (2 mL) in a pressure tube,. The reaction mixtures were stirred at 80 °C for 1 h. The solvent was rapidly removed under reduced pressure and the residue of the reaction was purified by silica gel chromatography using EA/PE to afford the products. KIE value ( $k_\text{H}/k_\text{D} = 1.2$ ) was determined on the basis of <sup>1</sup>H NMR analysis.

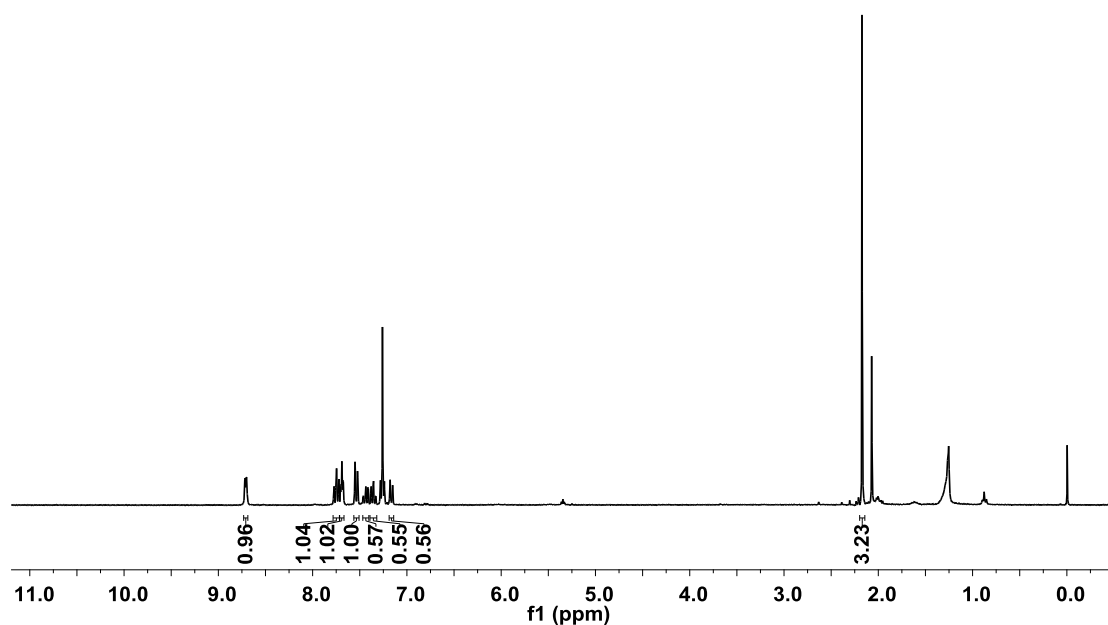

### Kinetic Isotope Effect Experiments

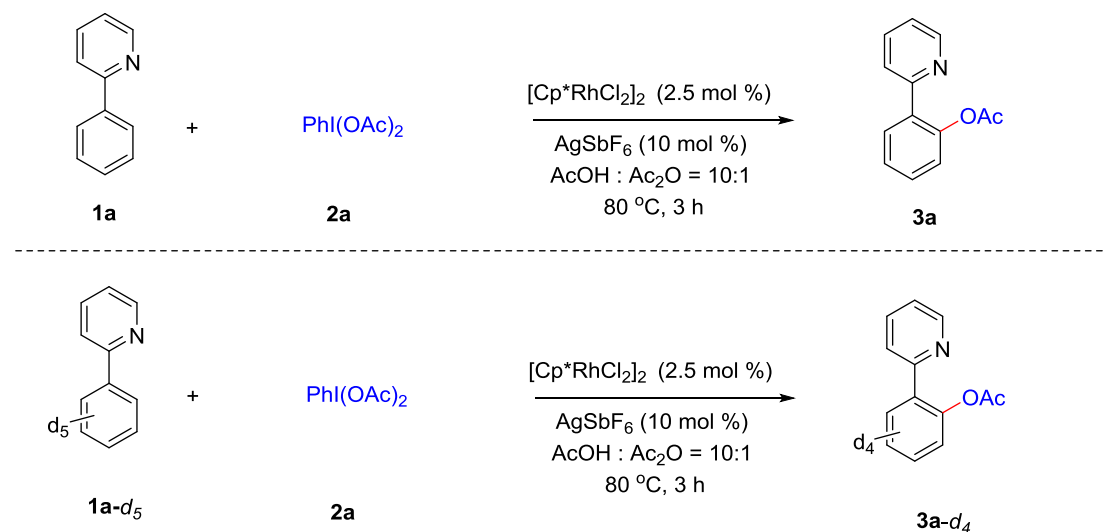

A mixture of **1a** (0.2 mmol, 31 mg) or **1a-d<sub>5</sub>** (0.2 mmol, 32 mg),  $\text{PhI}(\text{OAc})_2$  (0.2 mmol, 64mg),  $[\text{Cp}^*\text{RhCl}_2]_2$  (2.5 mol %),  $\text{AgSbF}_6$  (10 mol %), were dissolved in  $\text{AcOH}:\text{Ac}_2\text{O}(10:1)$  (2 mL) in a pressure tube,. The resulting mixture was stirred at  $80^\circ\text{C}$  for designated time (10 min, 20 min, 30 min, 40 min, and 50 min). The solution was concentrated and submitted to HPLC to provide the following yield.

| Time (min)                  | 10 | 20 | 30 | 40 | 50 |
|-----------------------------|----|----|----|----|----|
| <b>3a</b> (%)               | 12 | 16 | 20 | 29 | 33 |
| <b>3a-d<sub>4</sub></b> (%) | 7  | 13 | 18 | 20 | 25 |

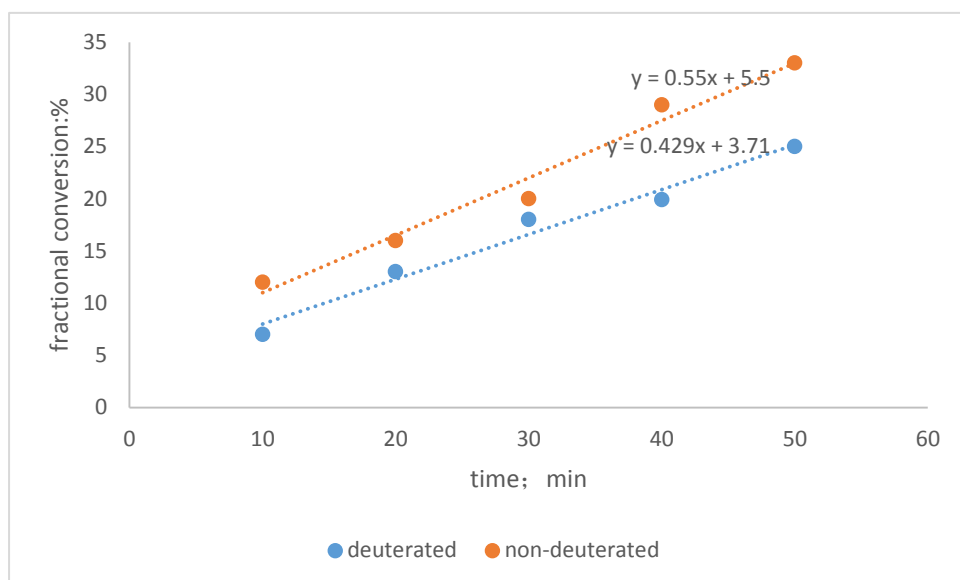

$$\text{KIE} = 0.55/0.429 = 1.28$$



$^1\text{H}$  NMR and  $^{13}\text{C}$  NMR  
Compound **2a**

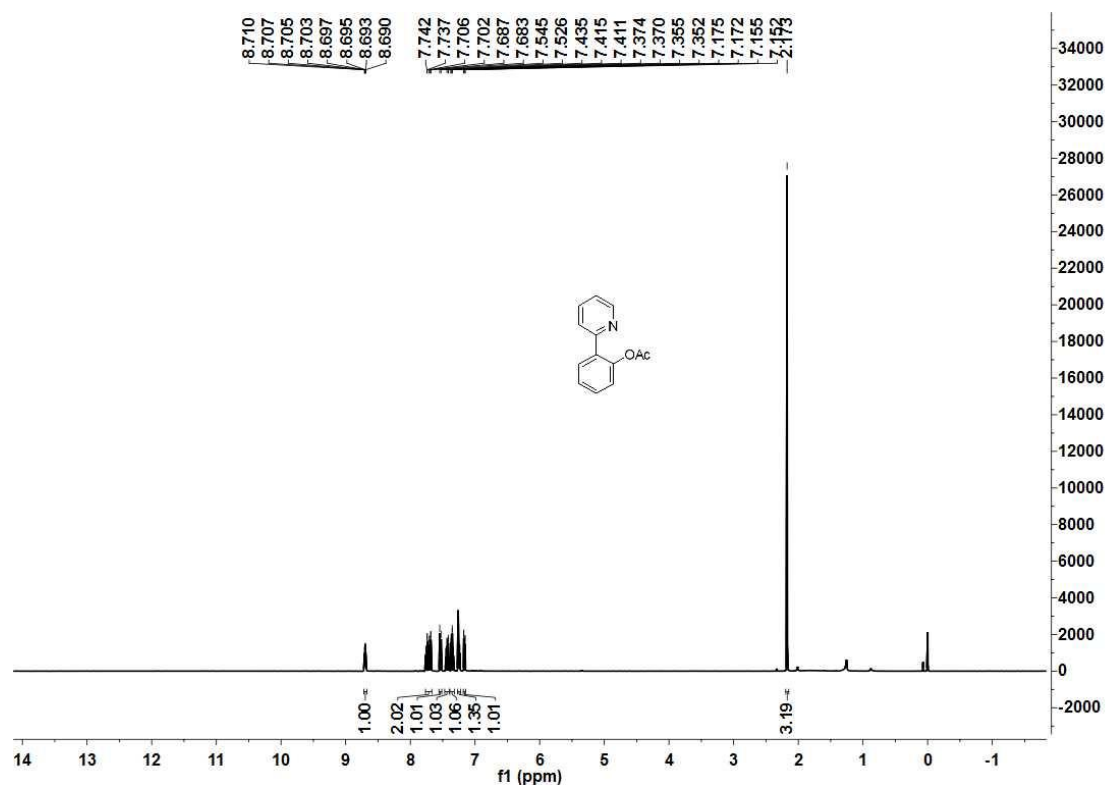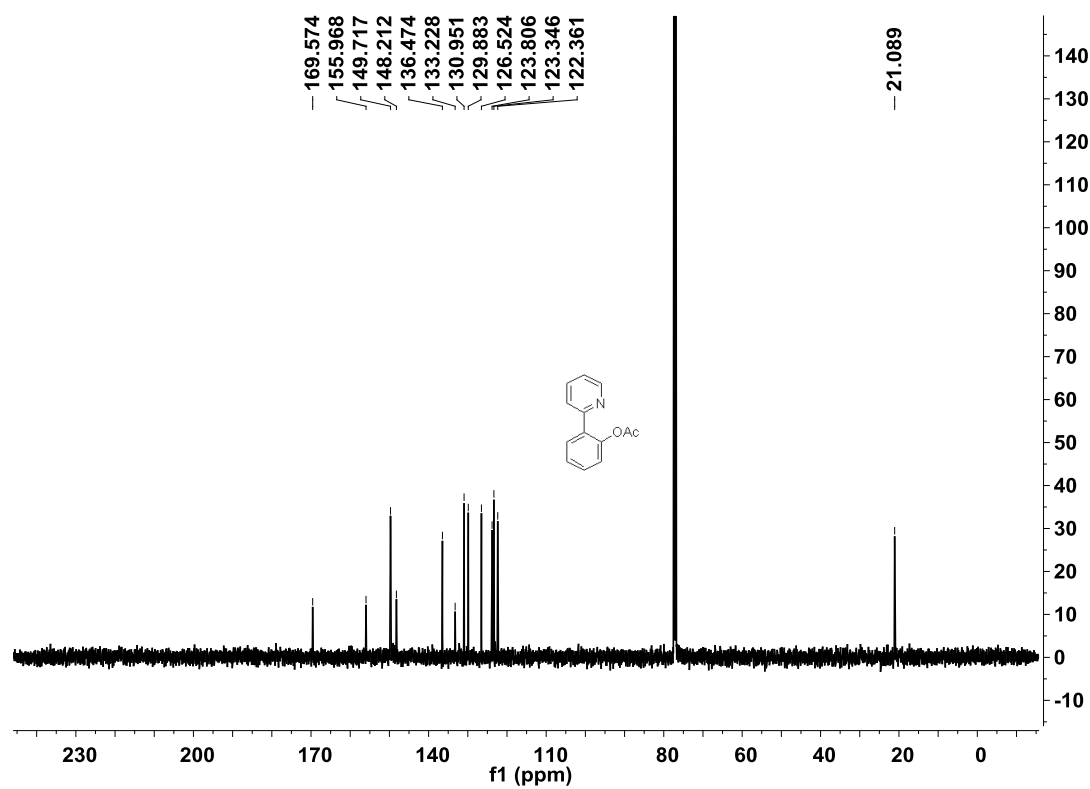

# Compound 2b

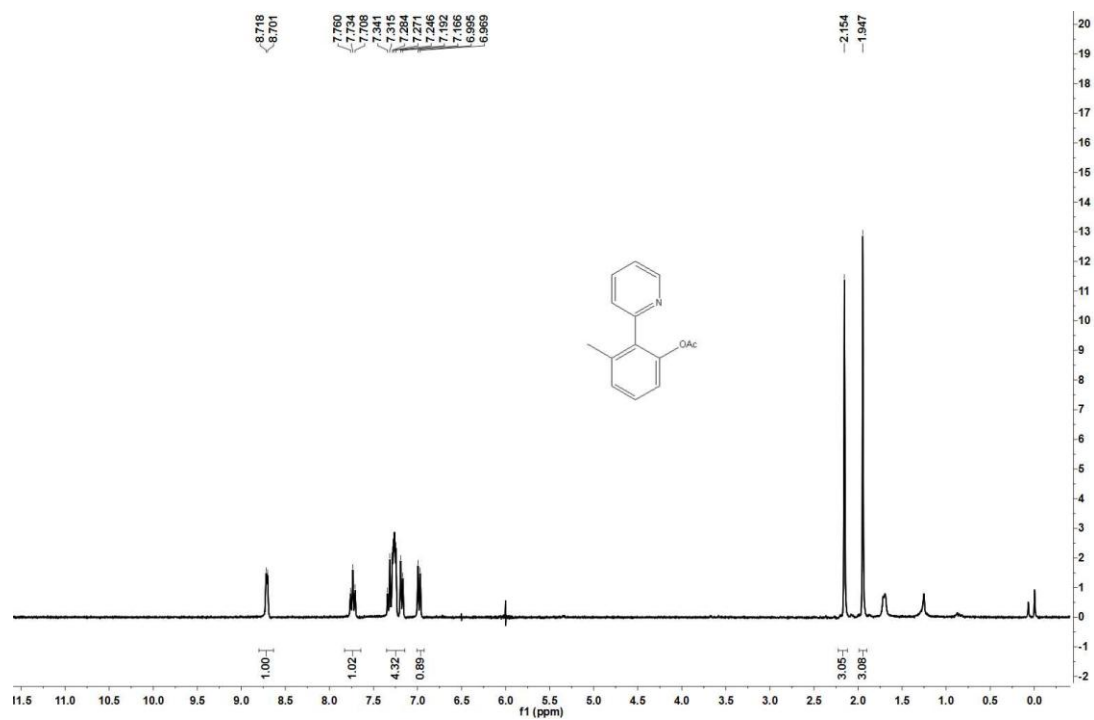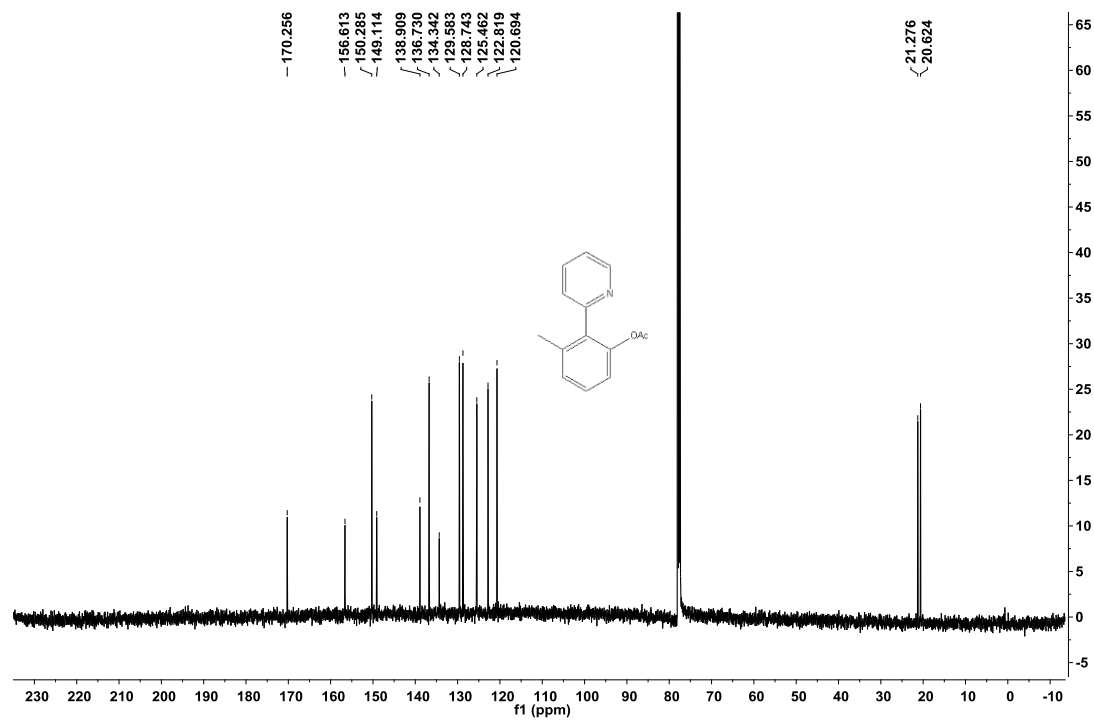

# Compound 2c

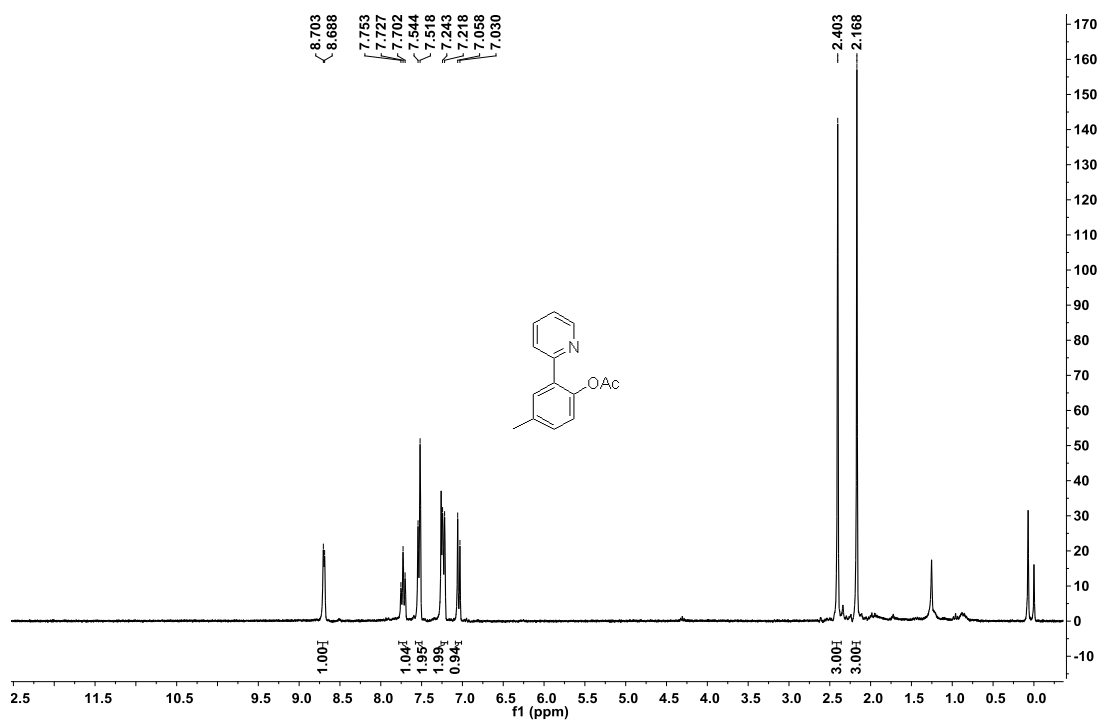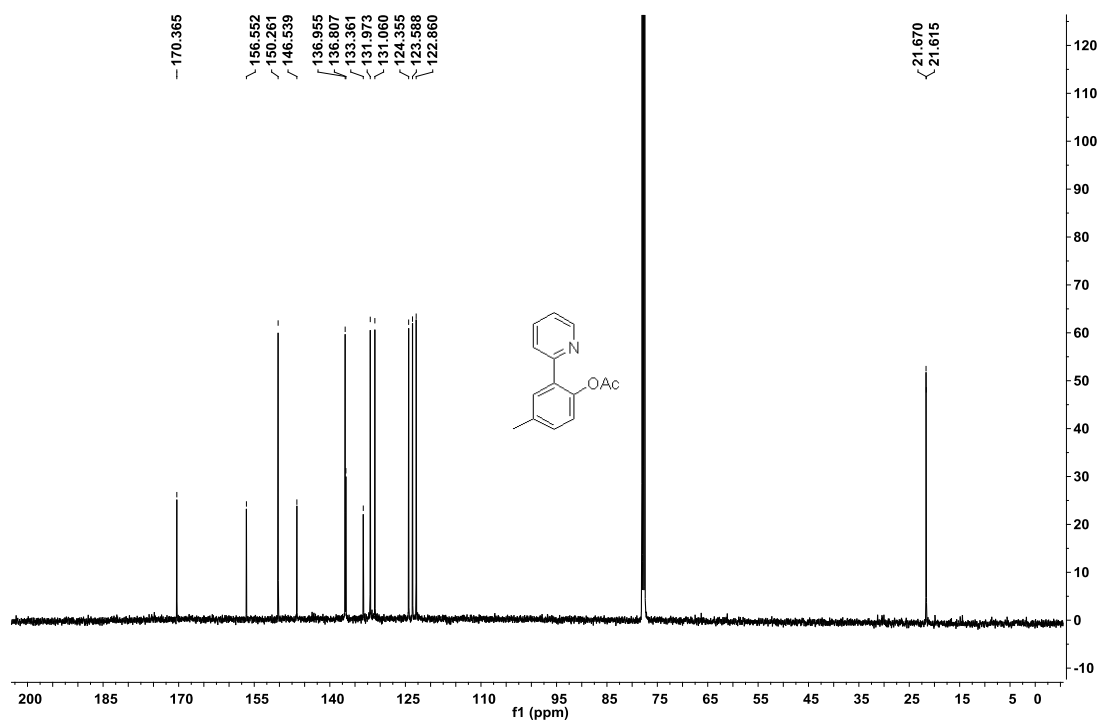

Compound **2d**

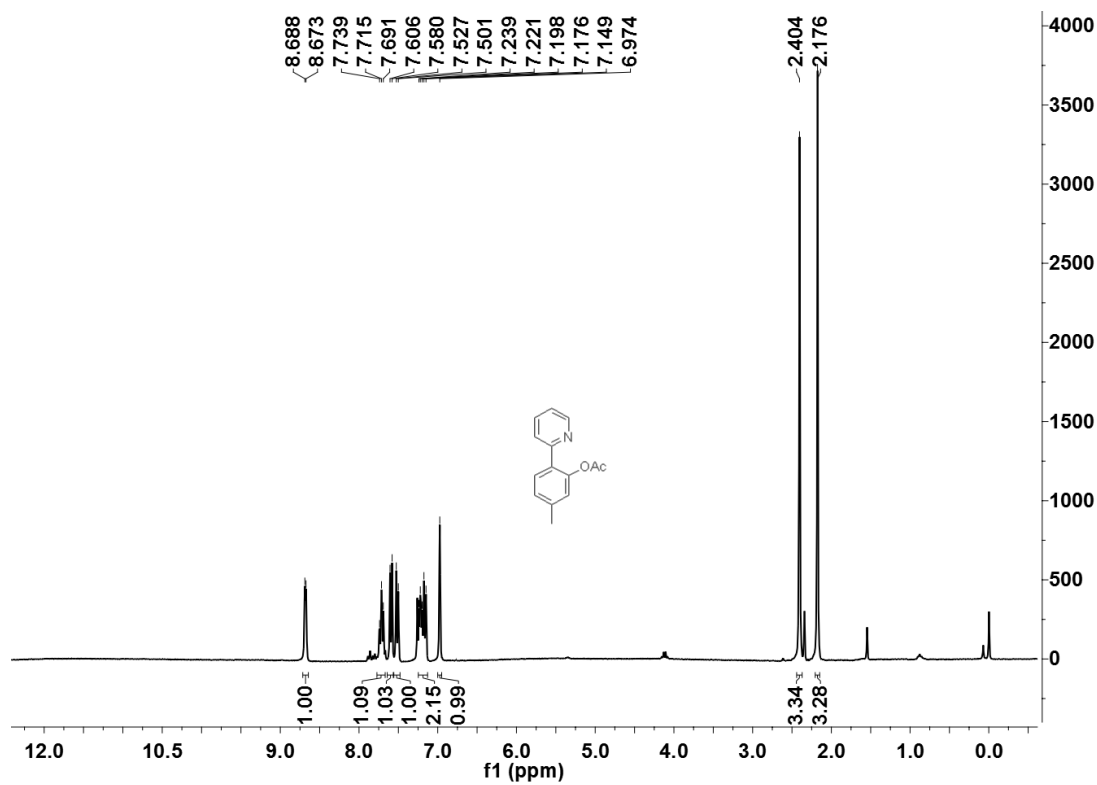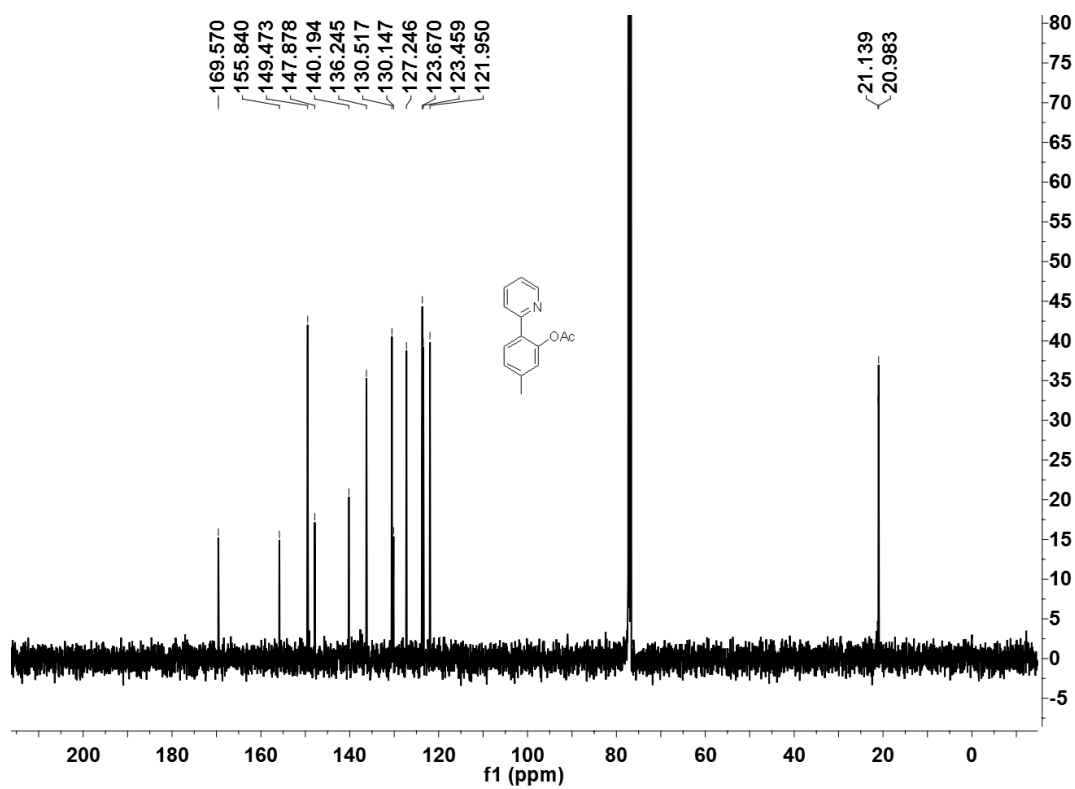

# Compound 2e

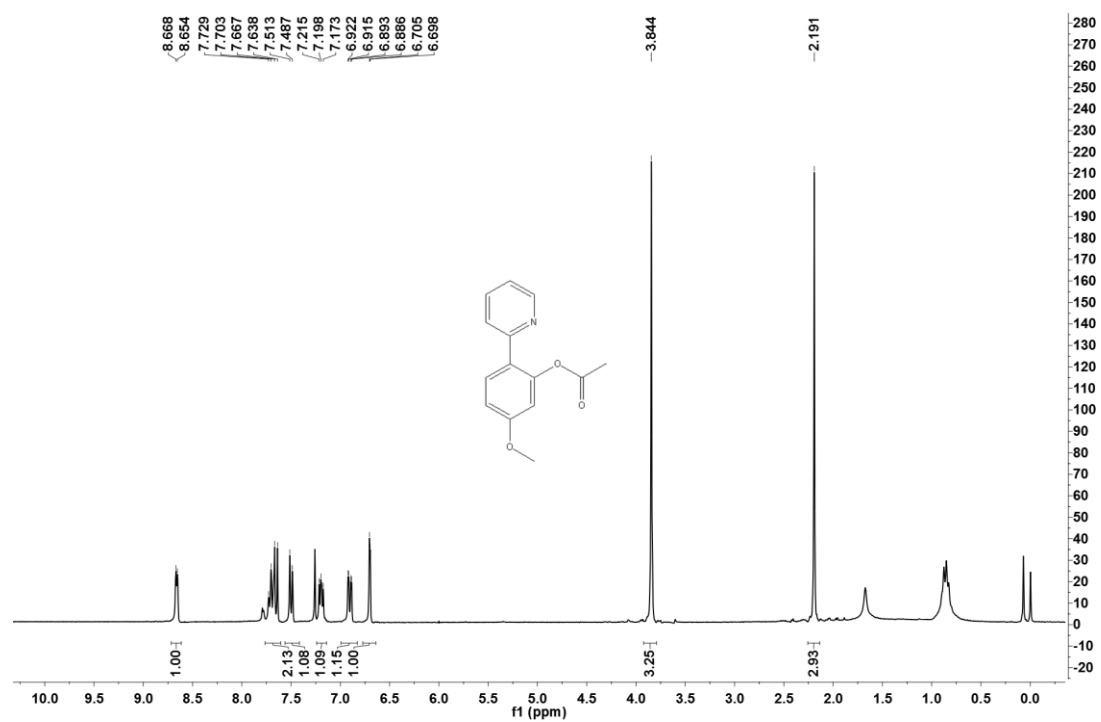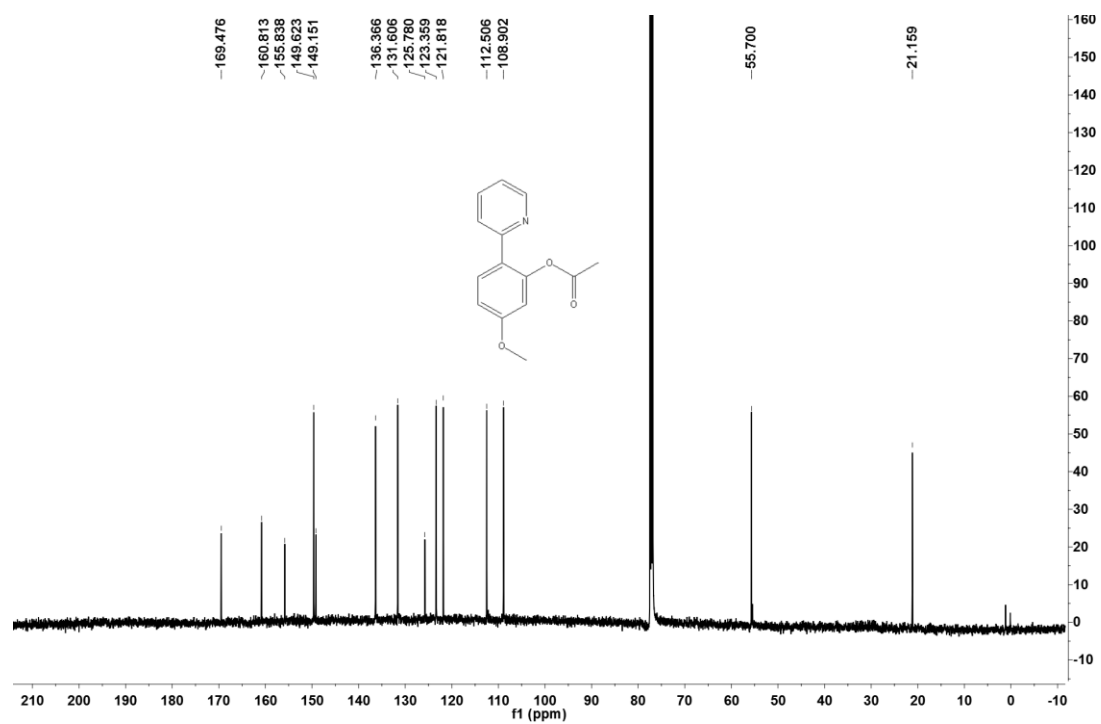

# Compound 2f

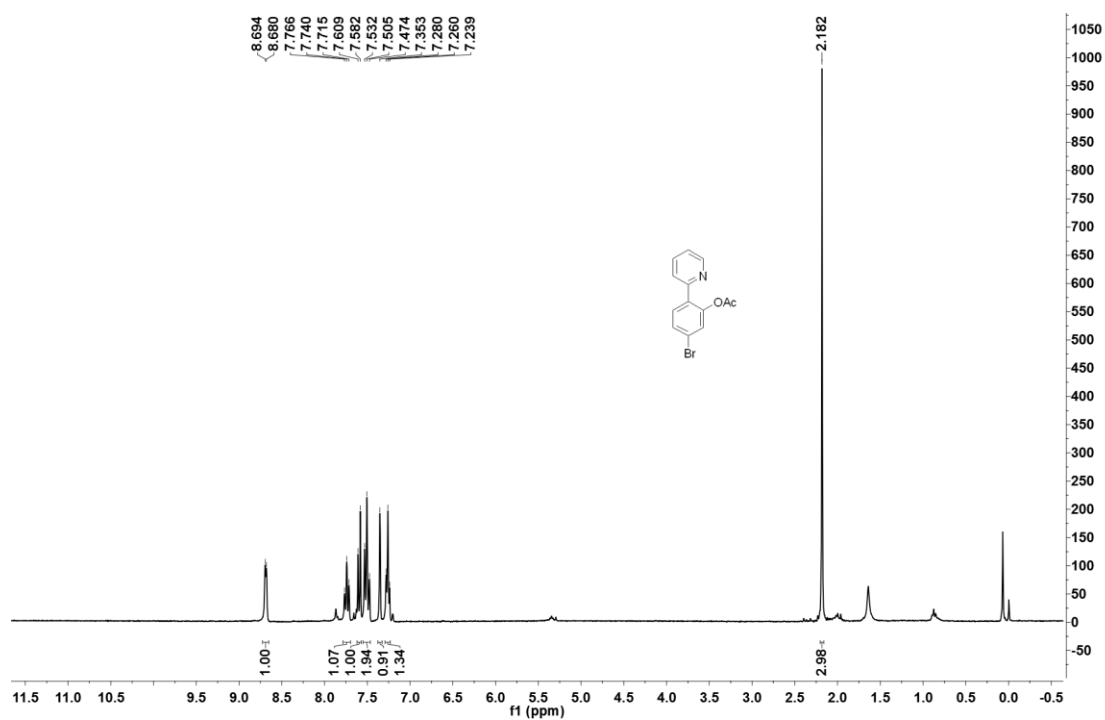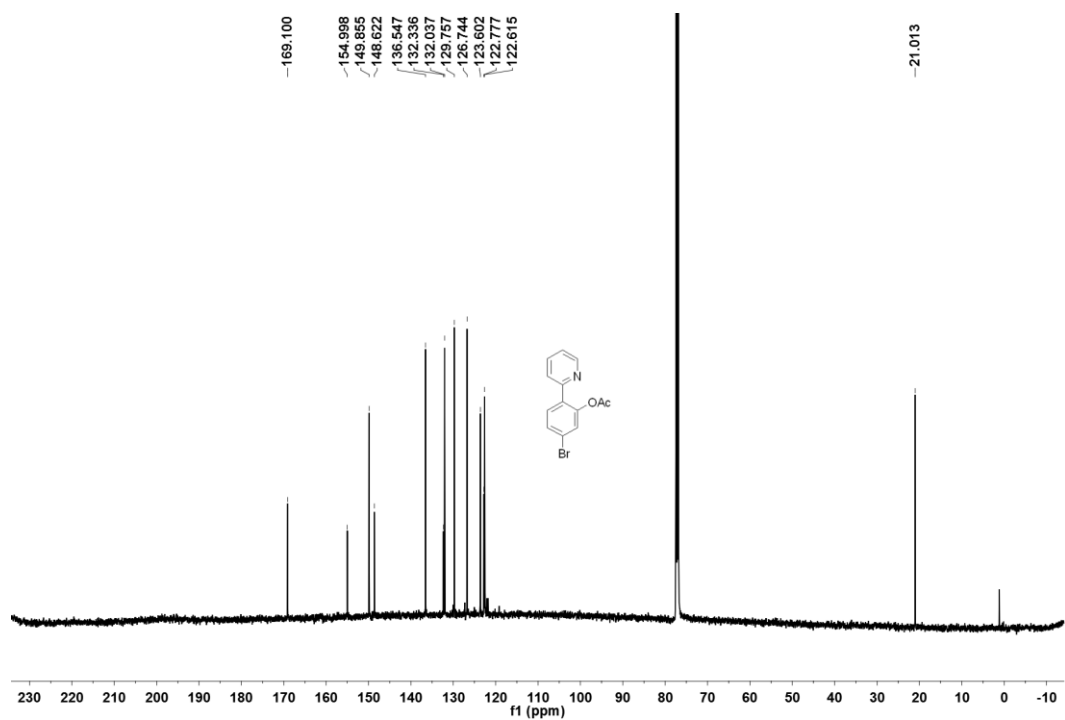

Compound **2g**

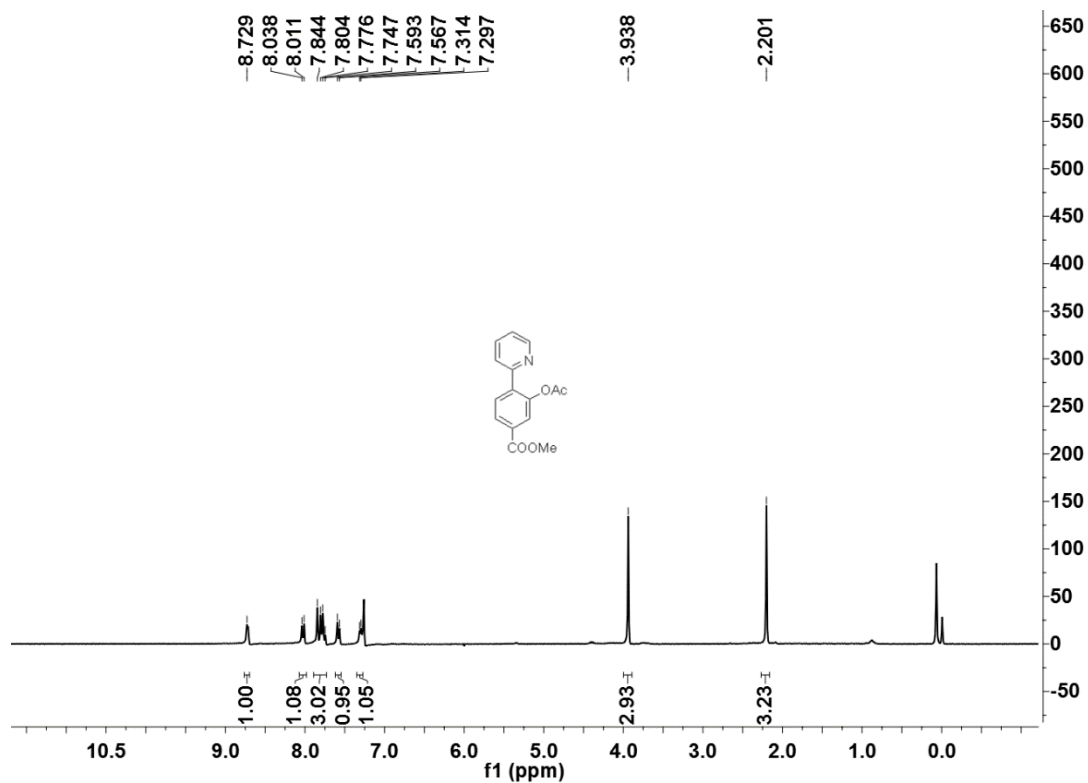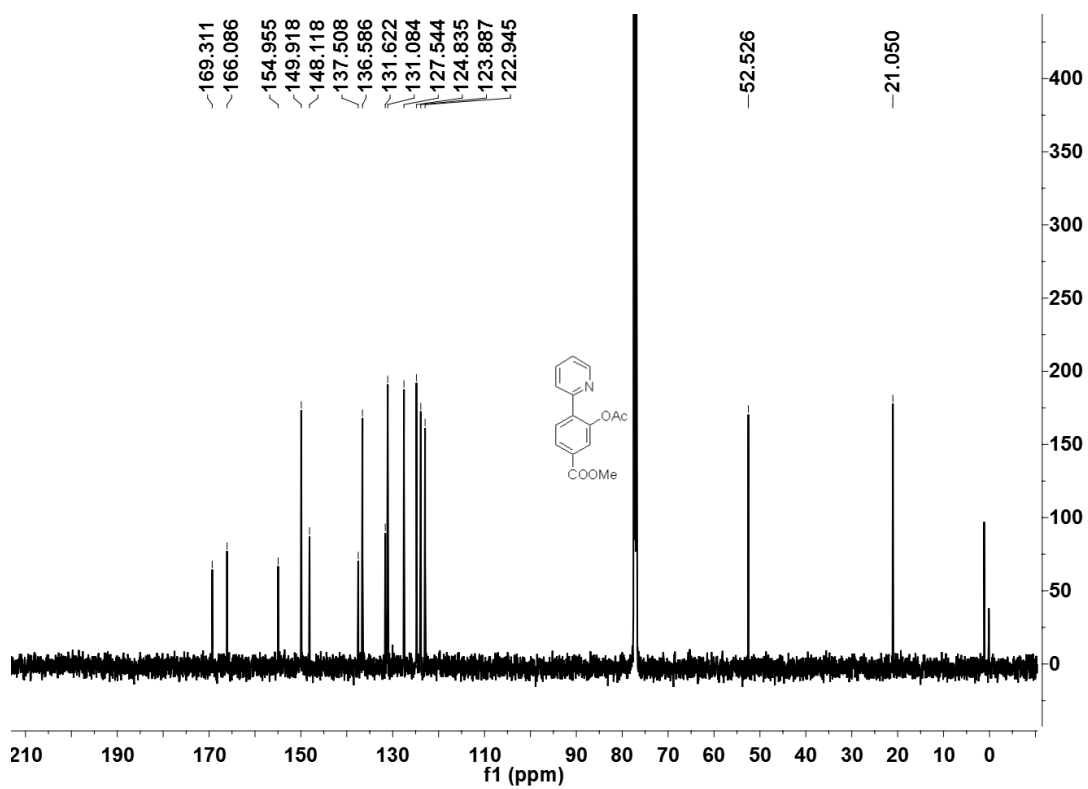

# Compound 2h

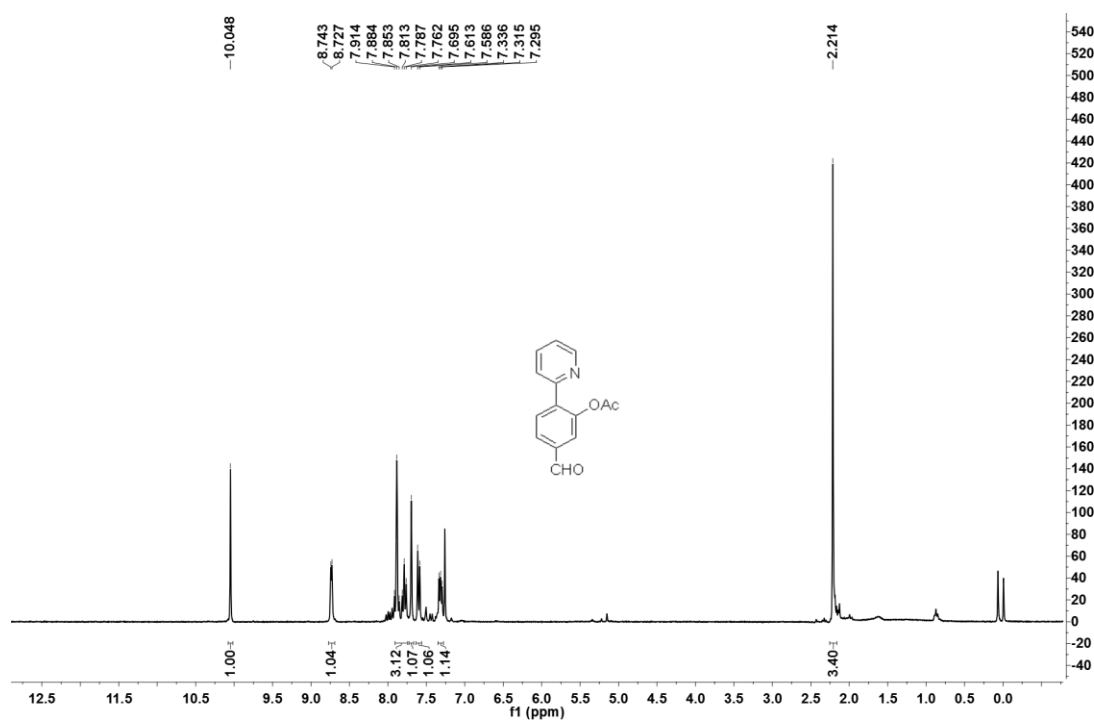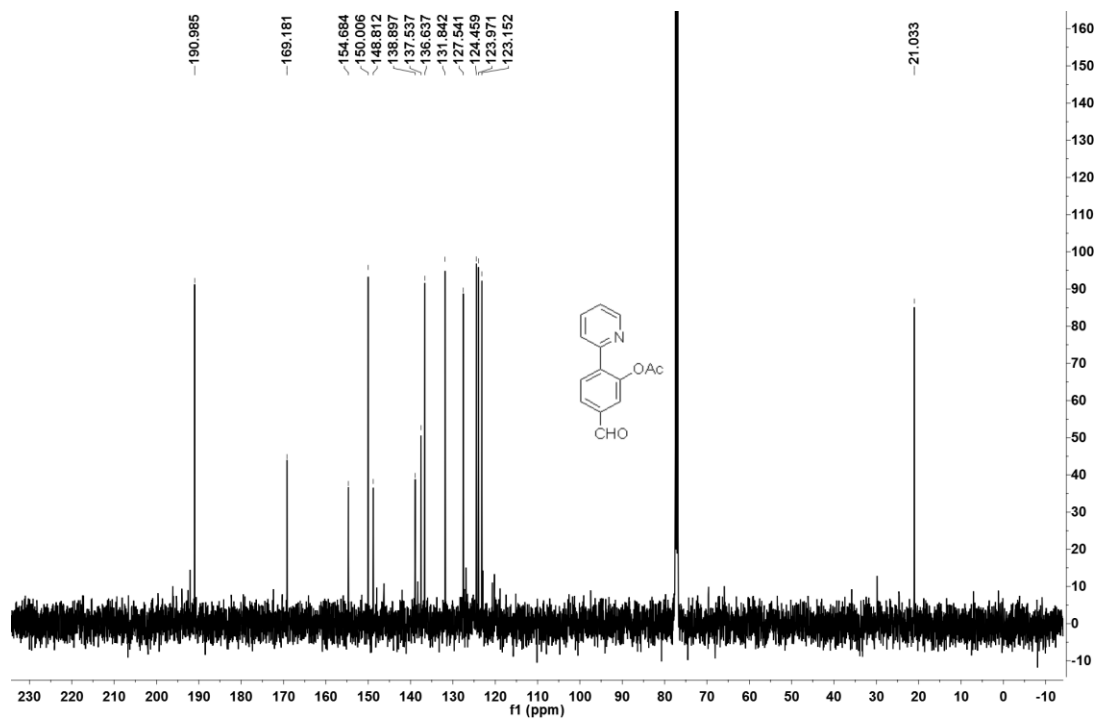



# Compound 2i

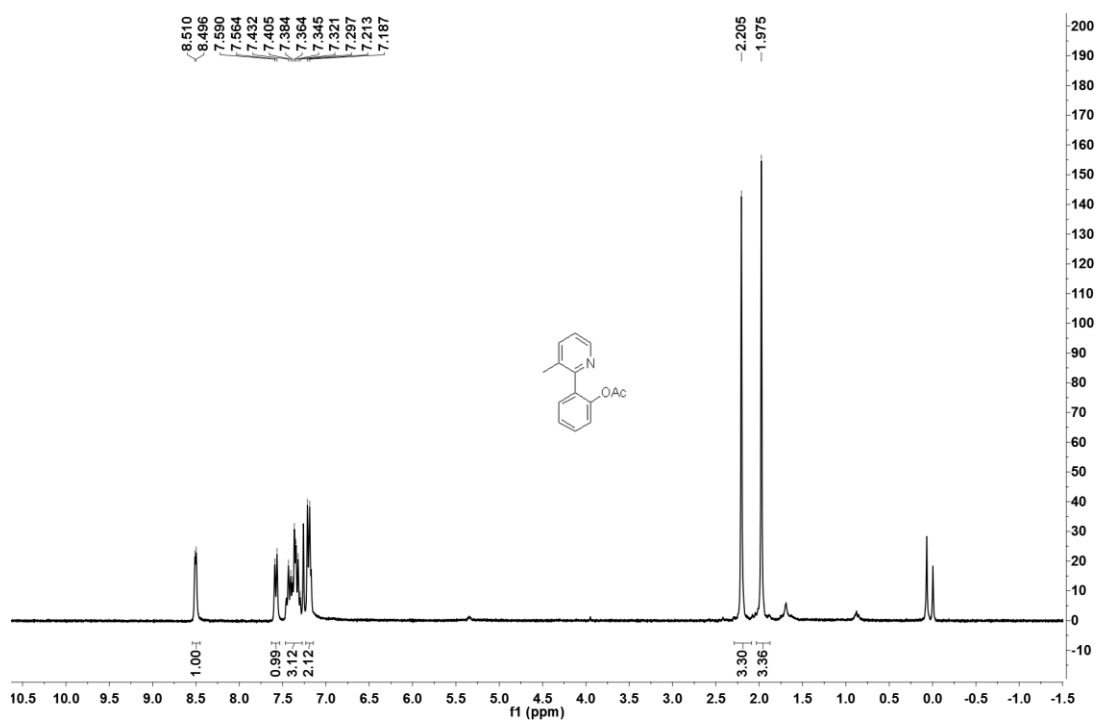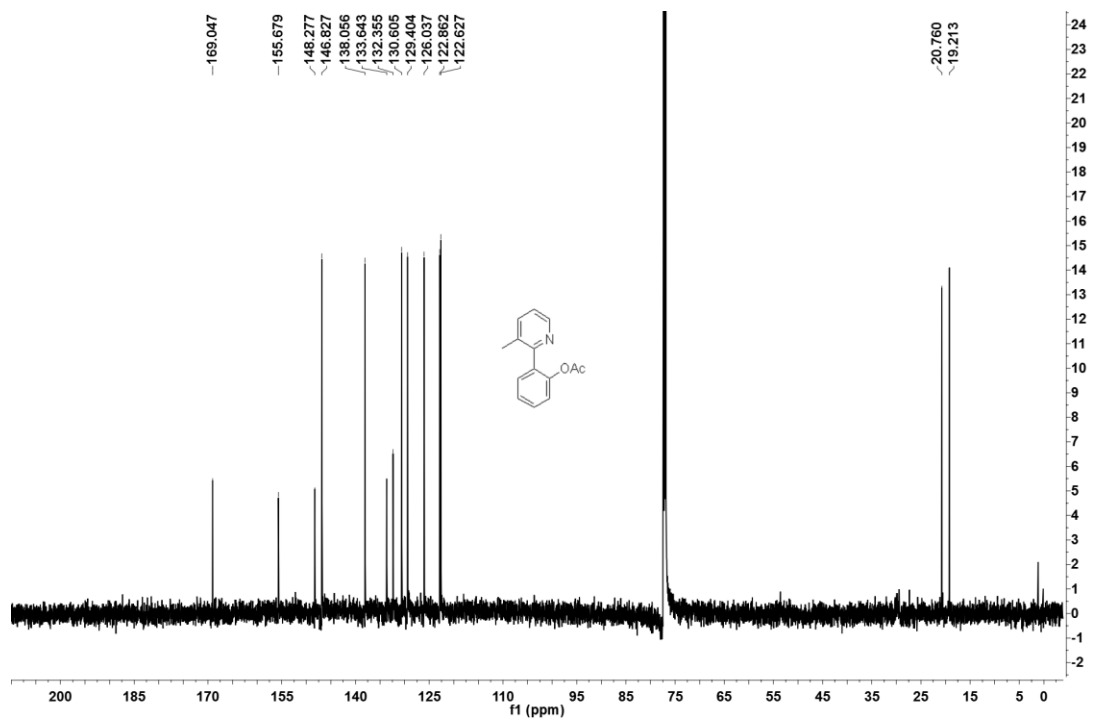

Compound **2j**

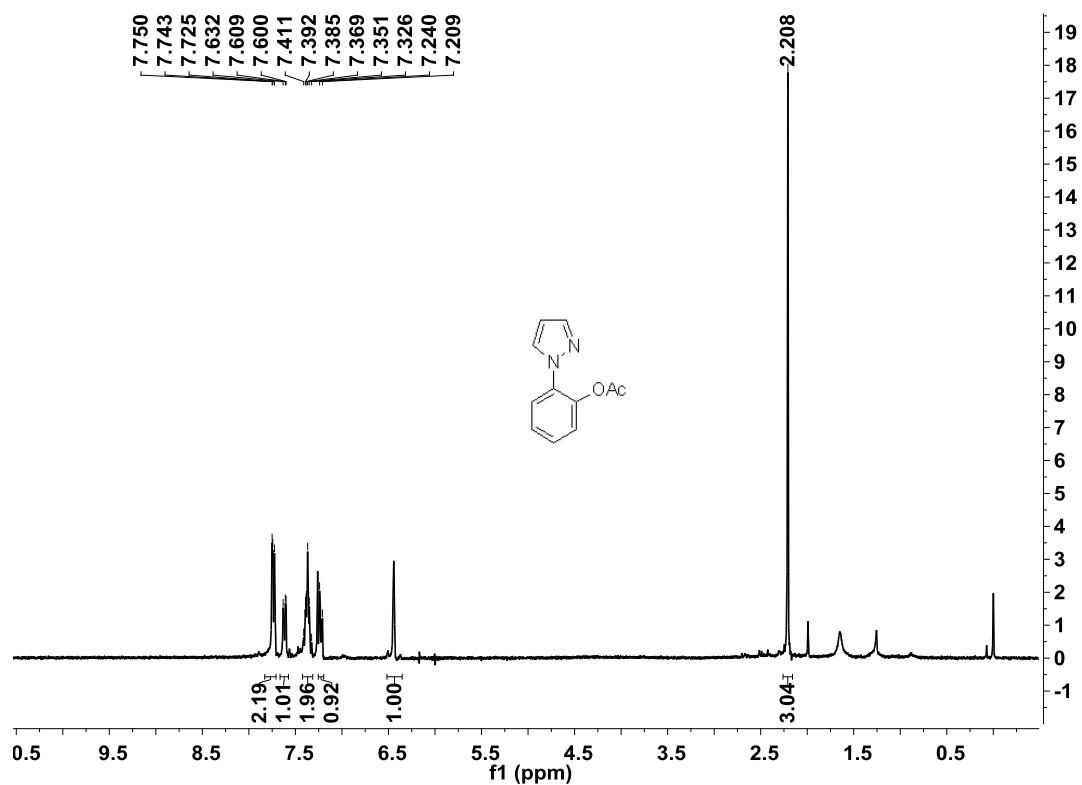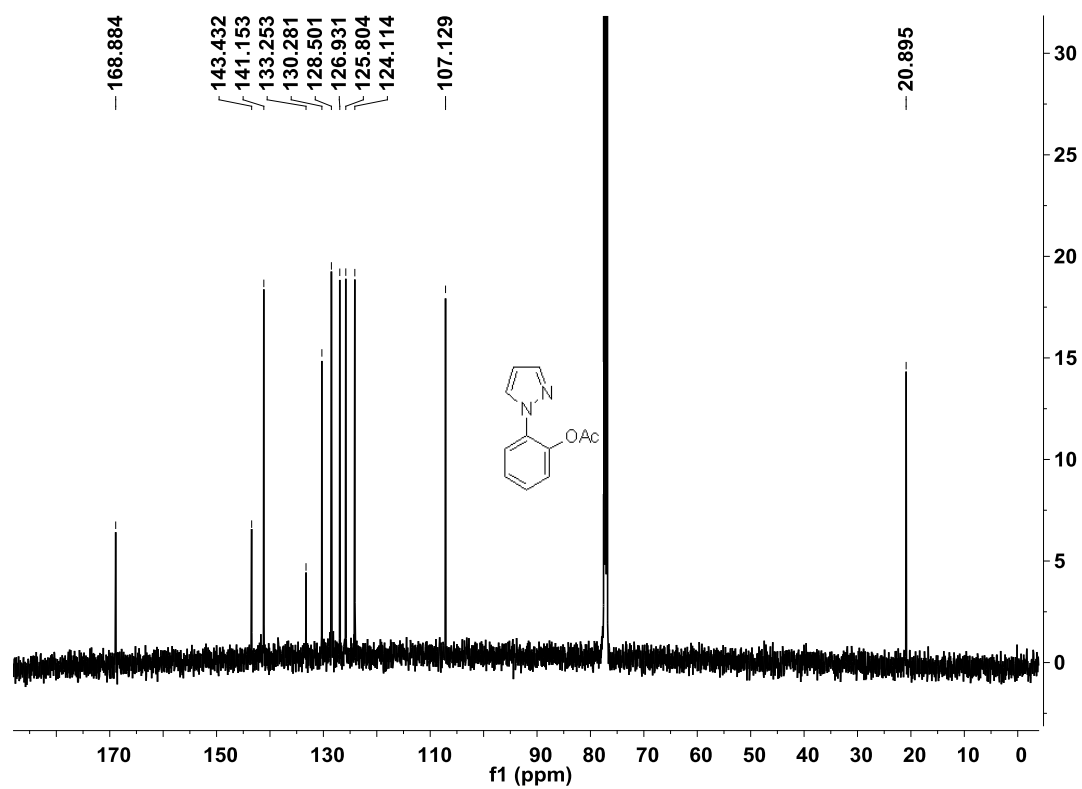

Compound **2k**

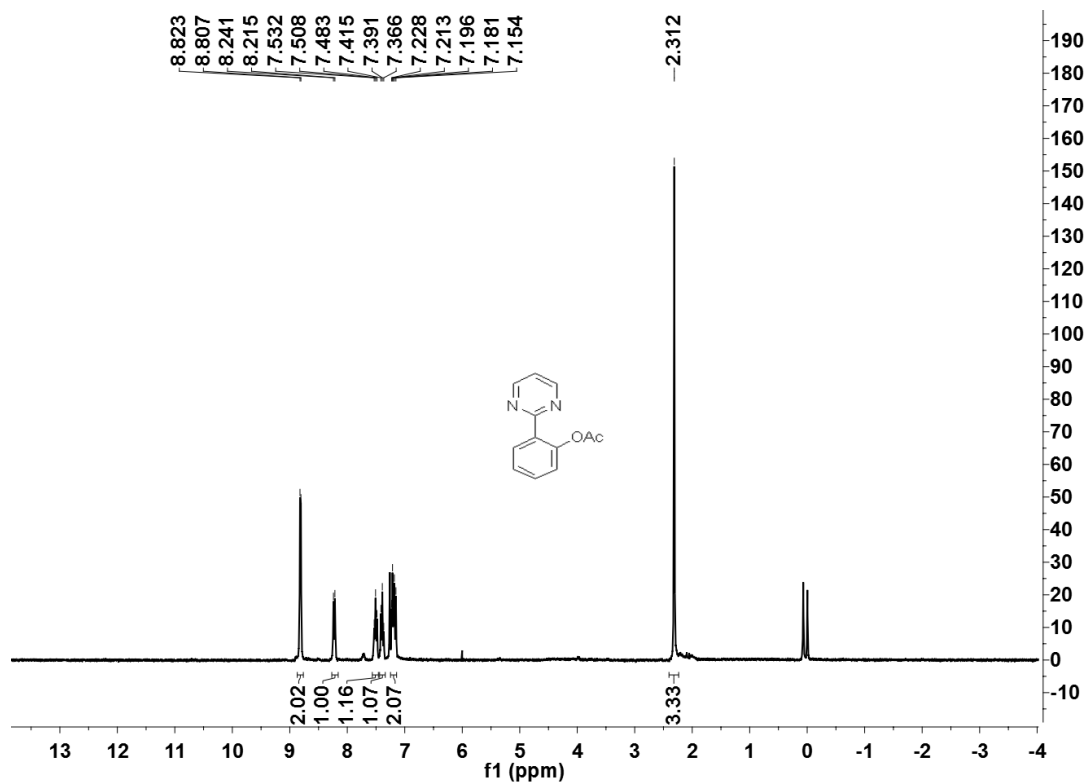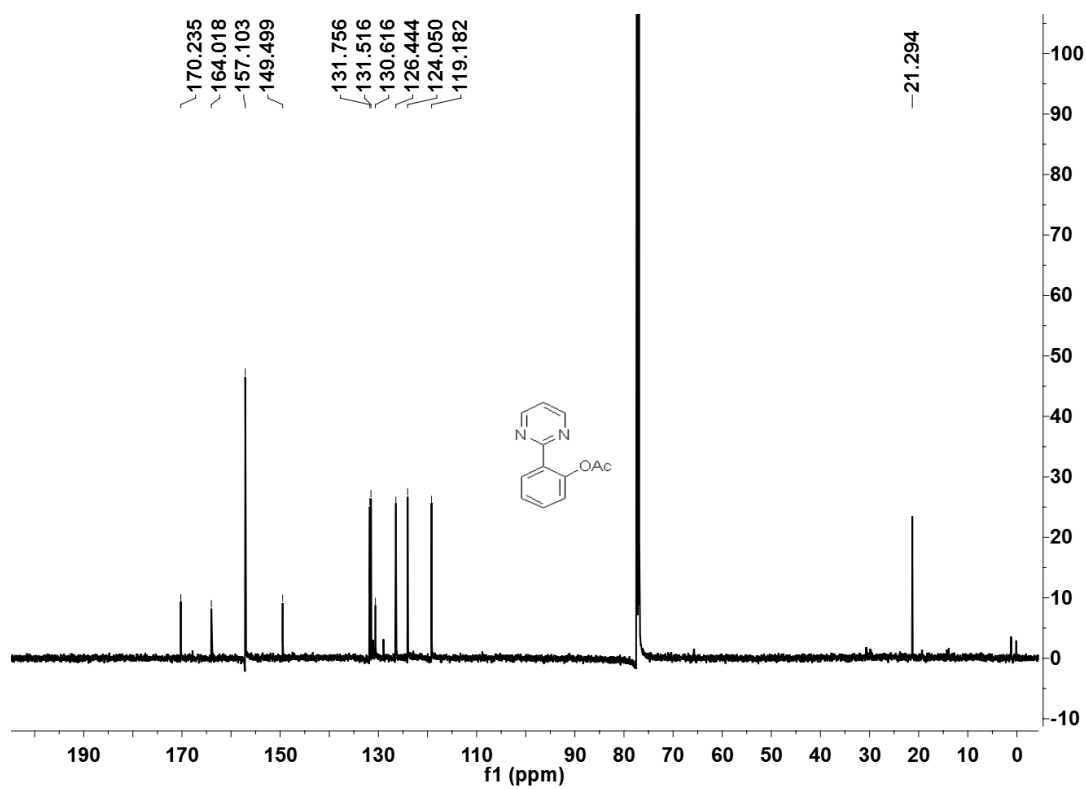

# Compound 2l

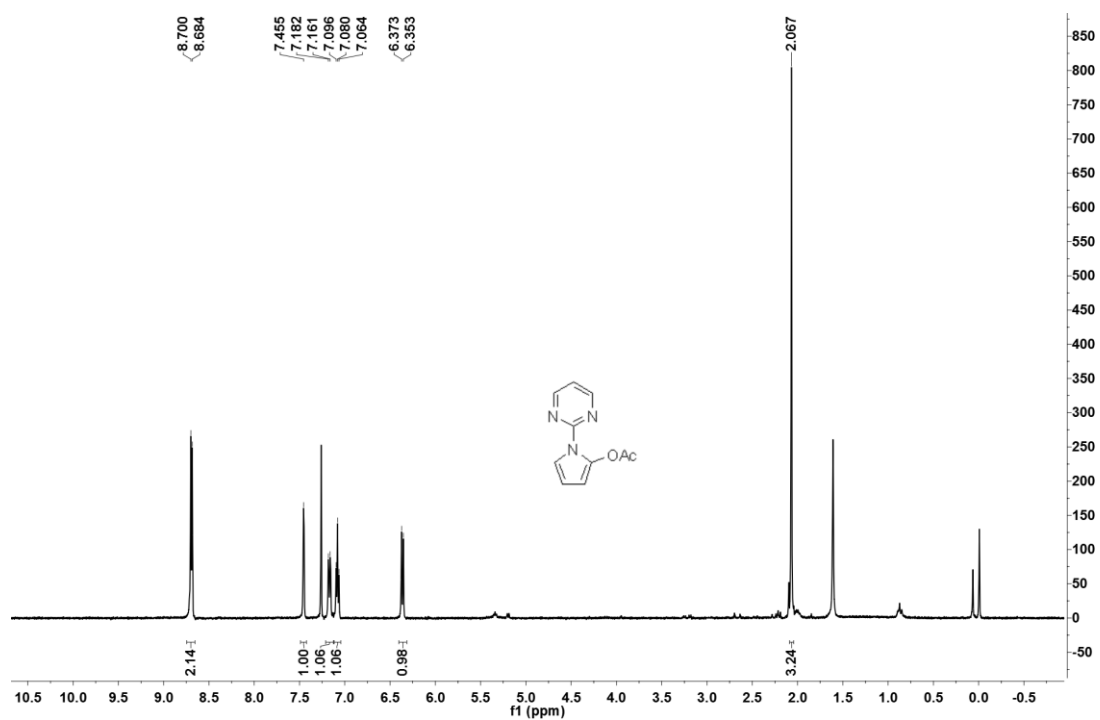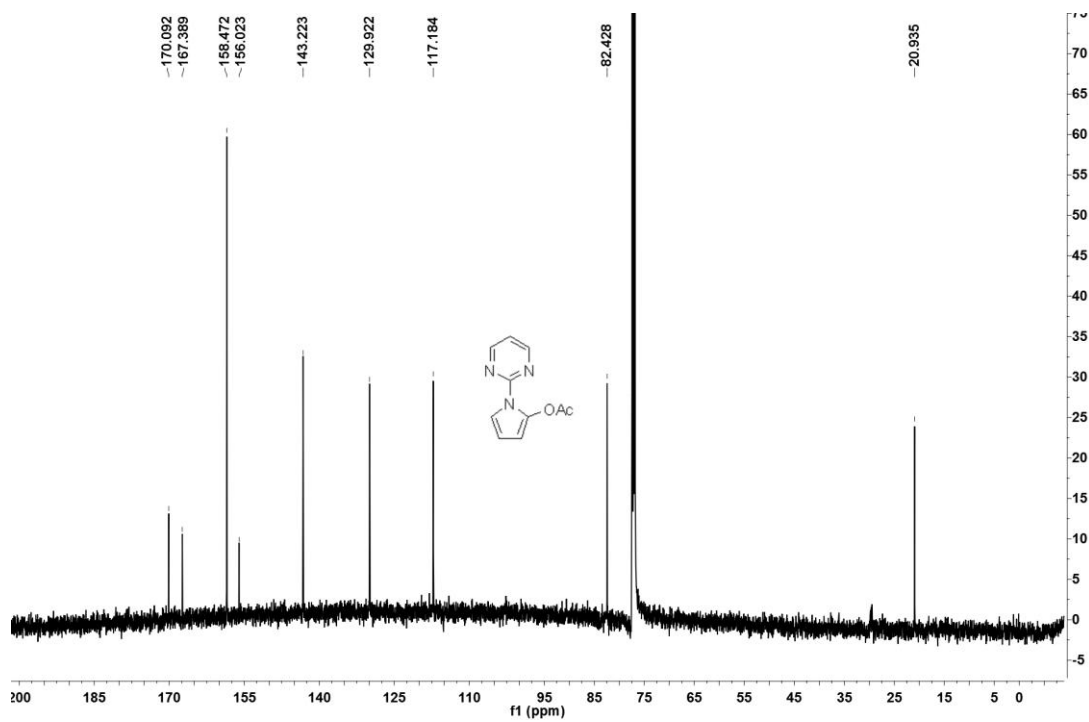

# Compound **2m**

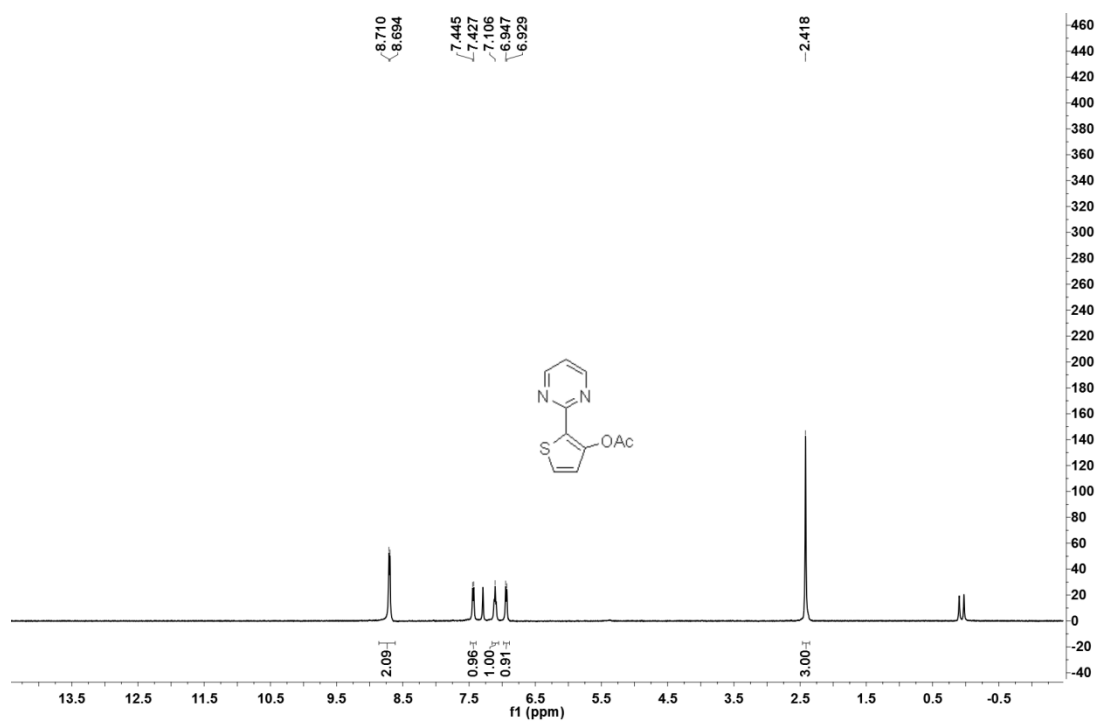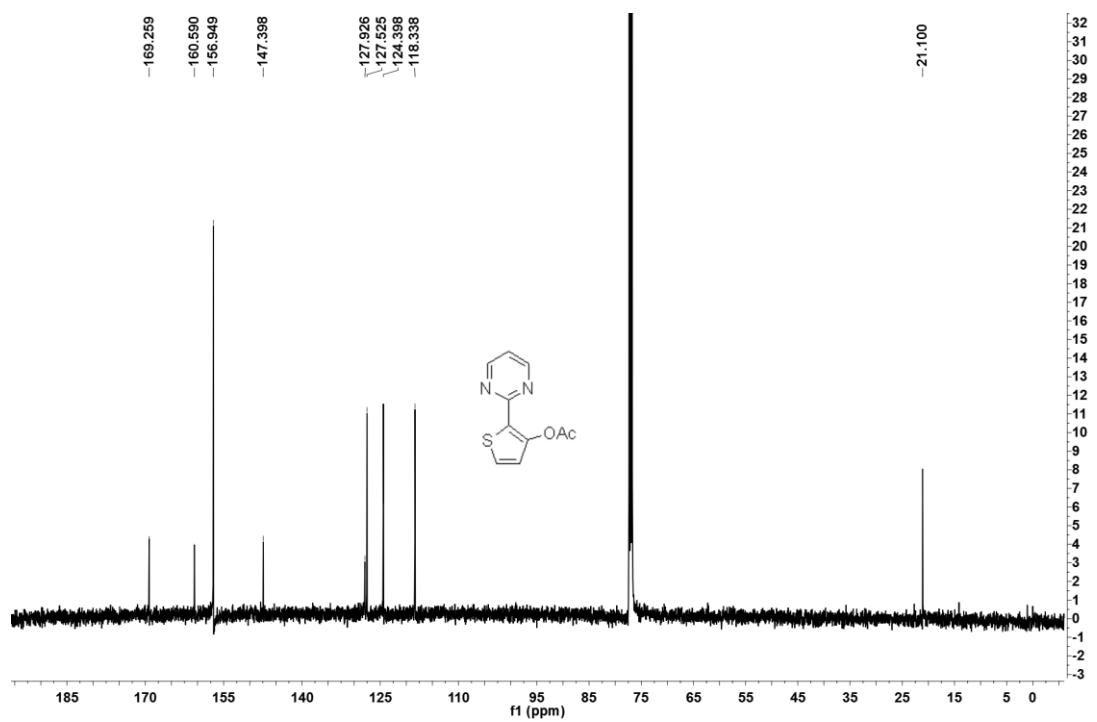

Compound **2n**

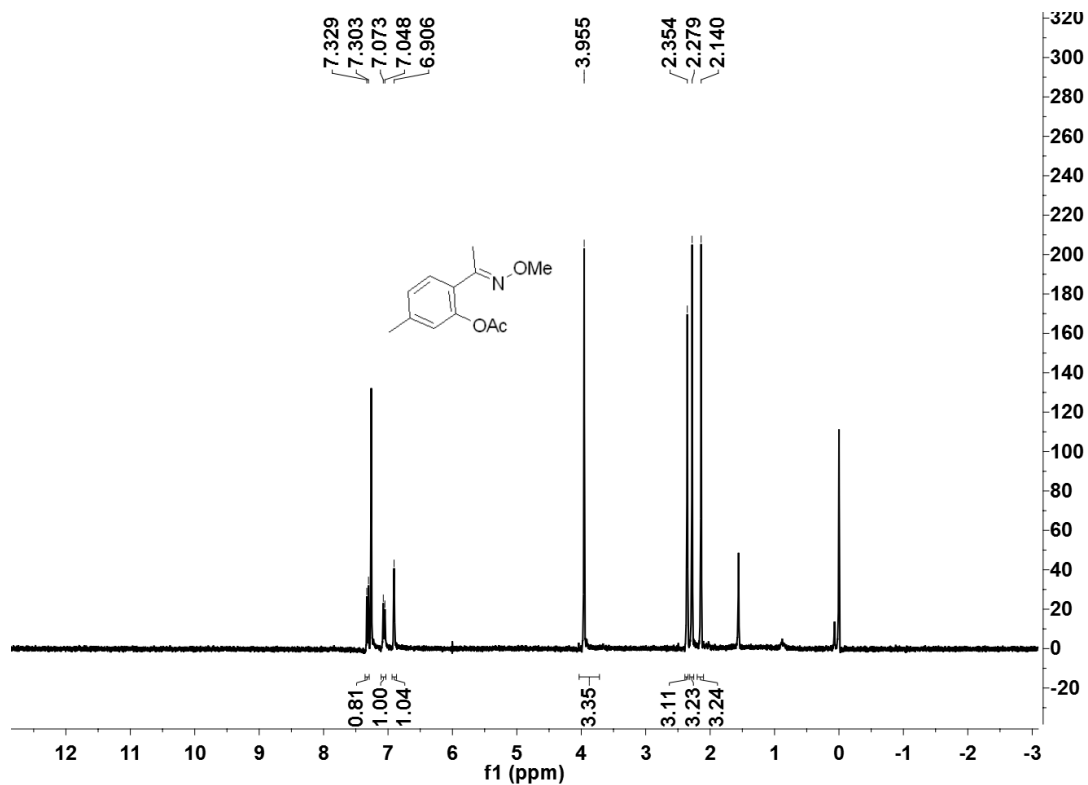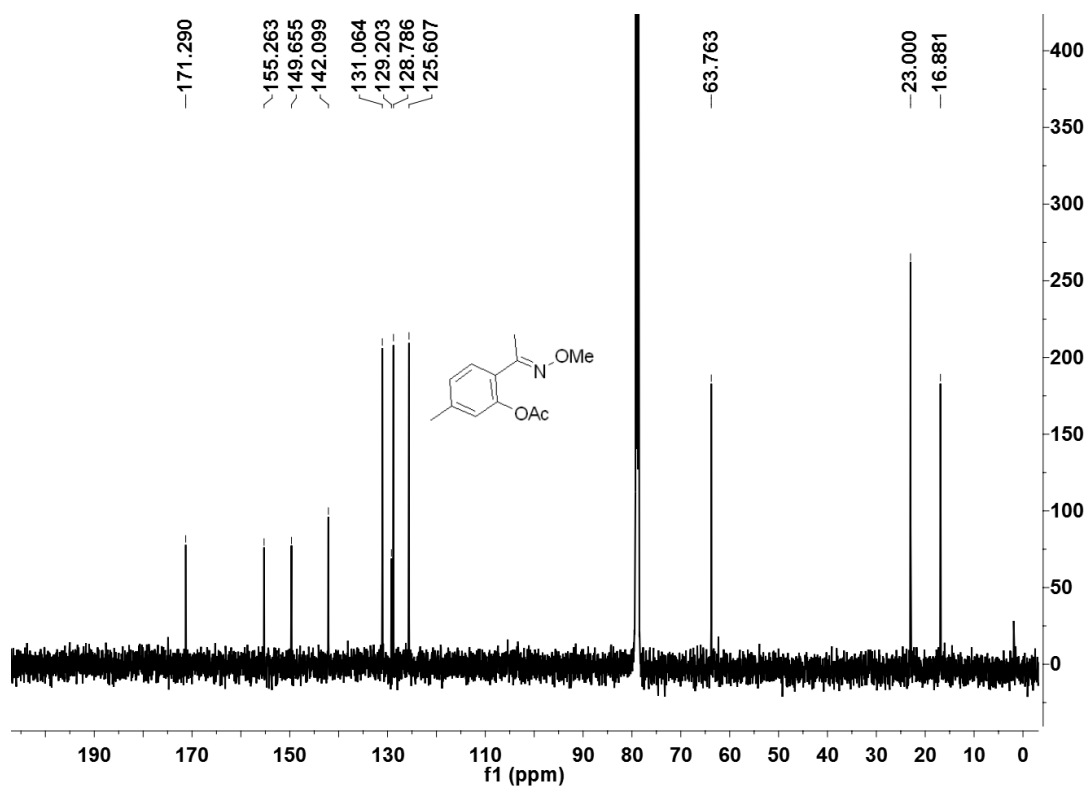

# Compound 2o

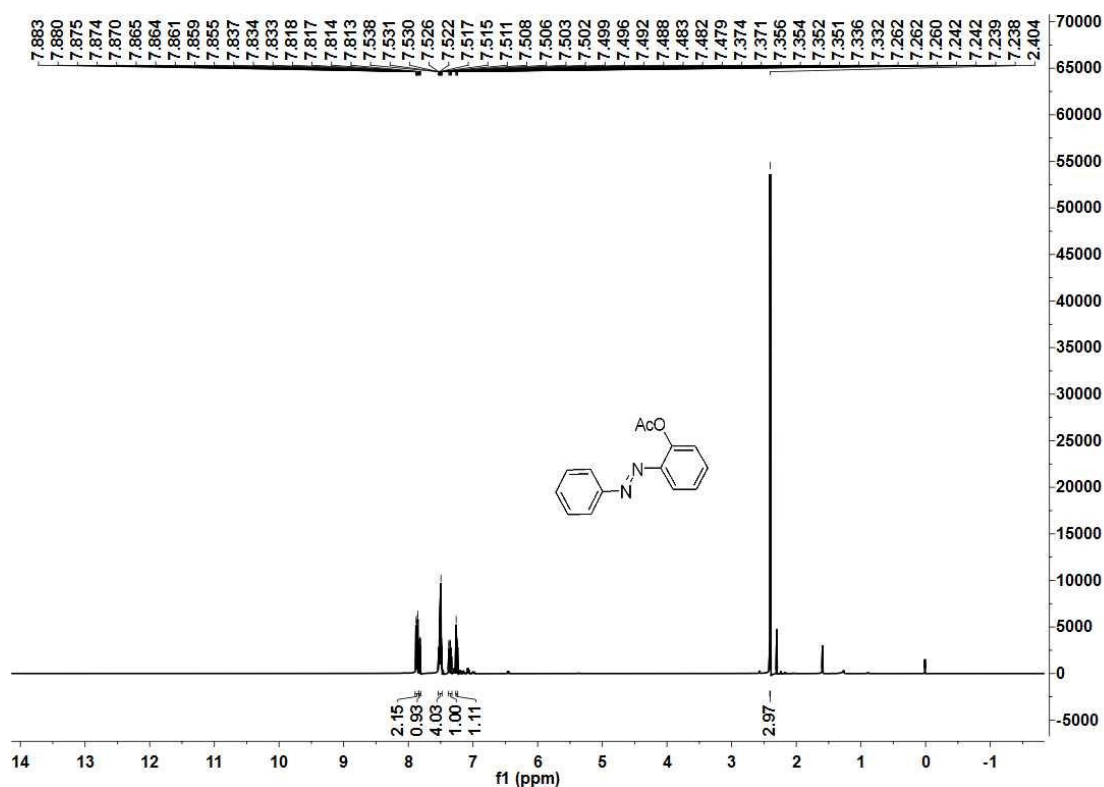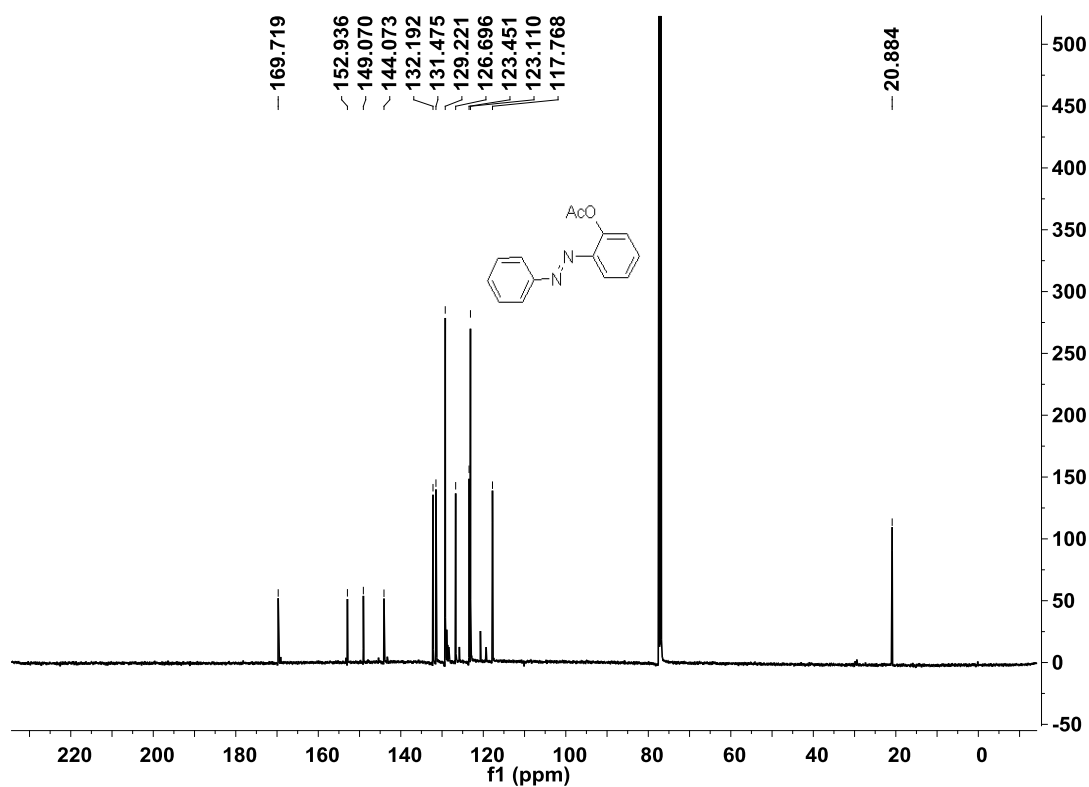

Compound **3a**

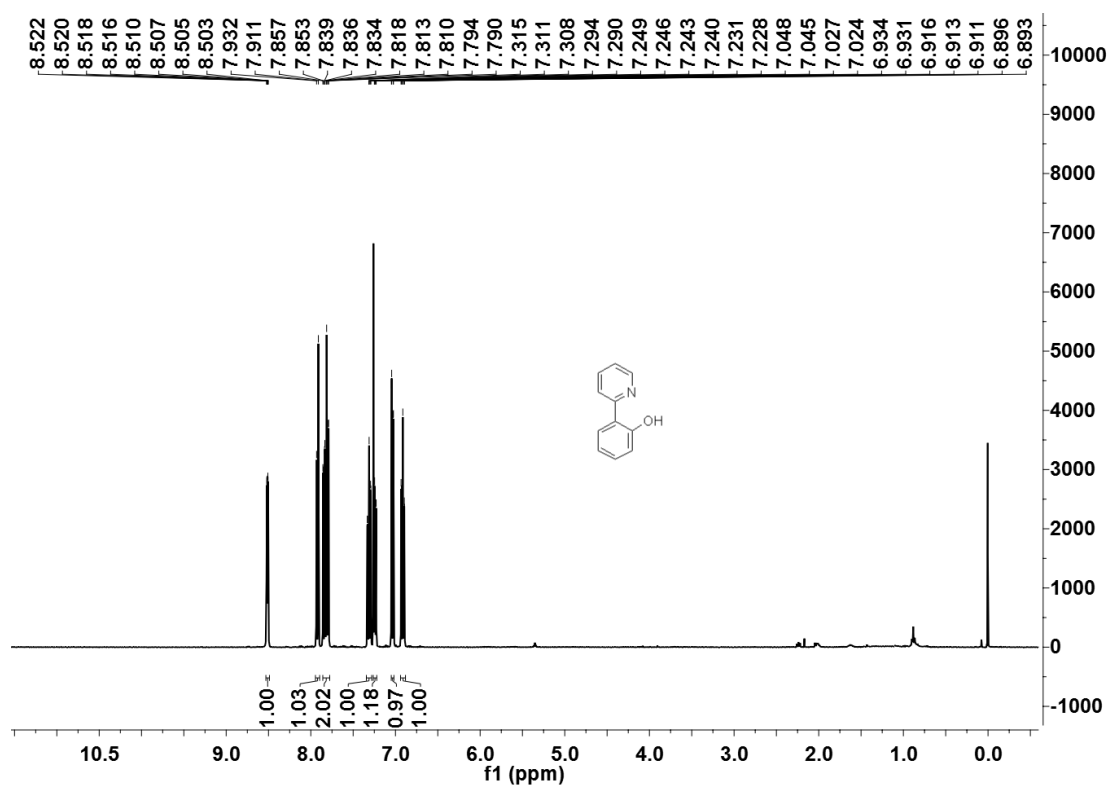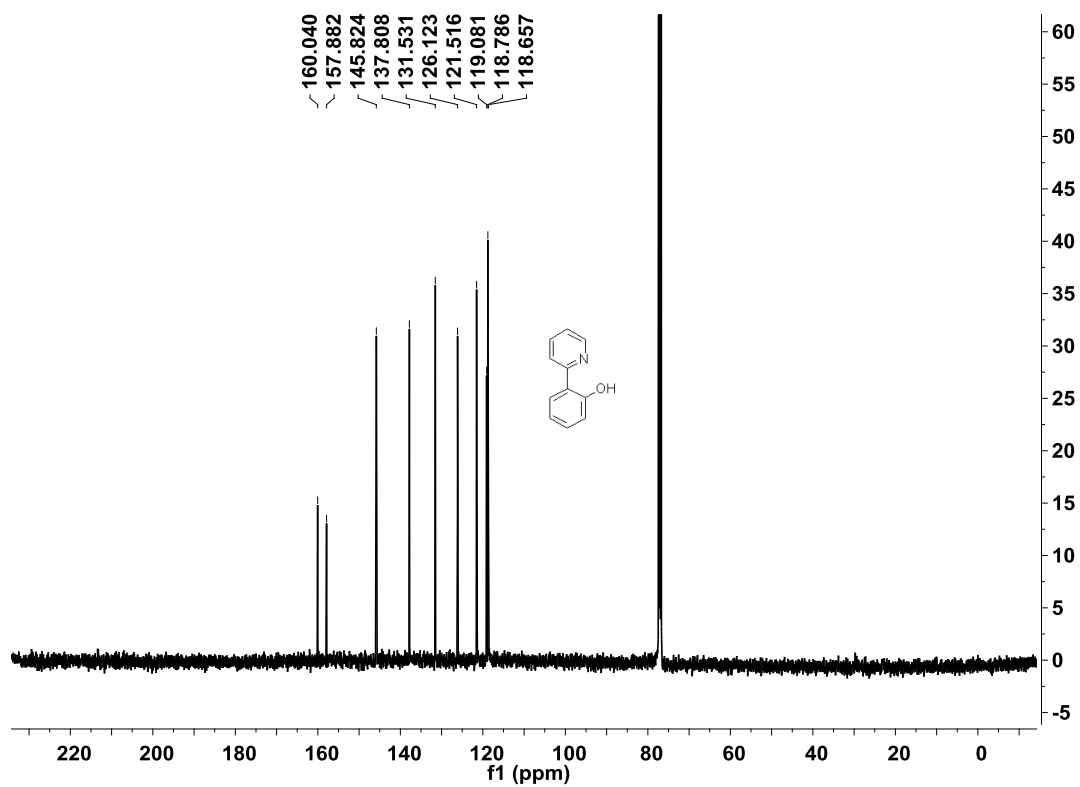



Compound **3b**

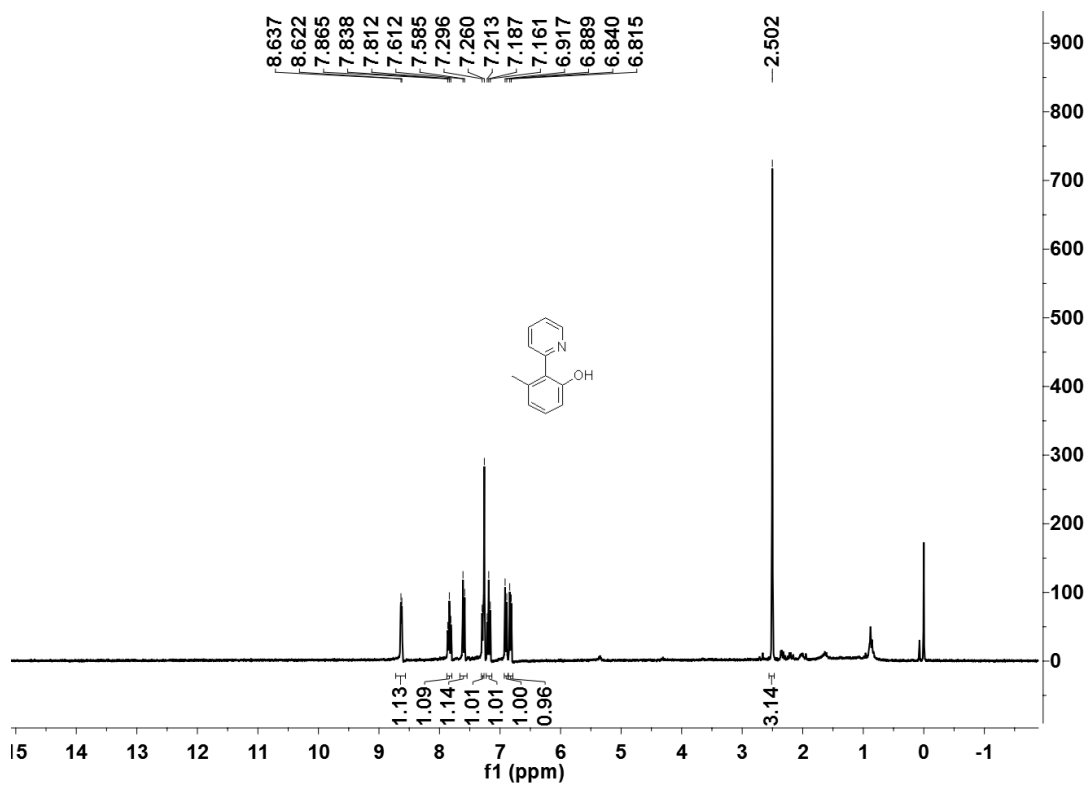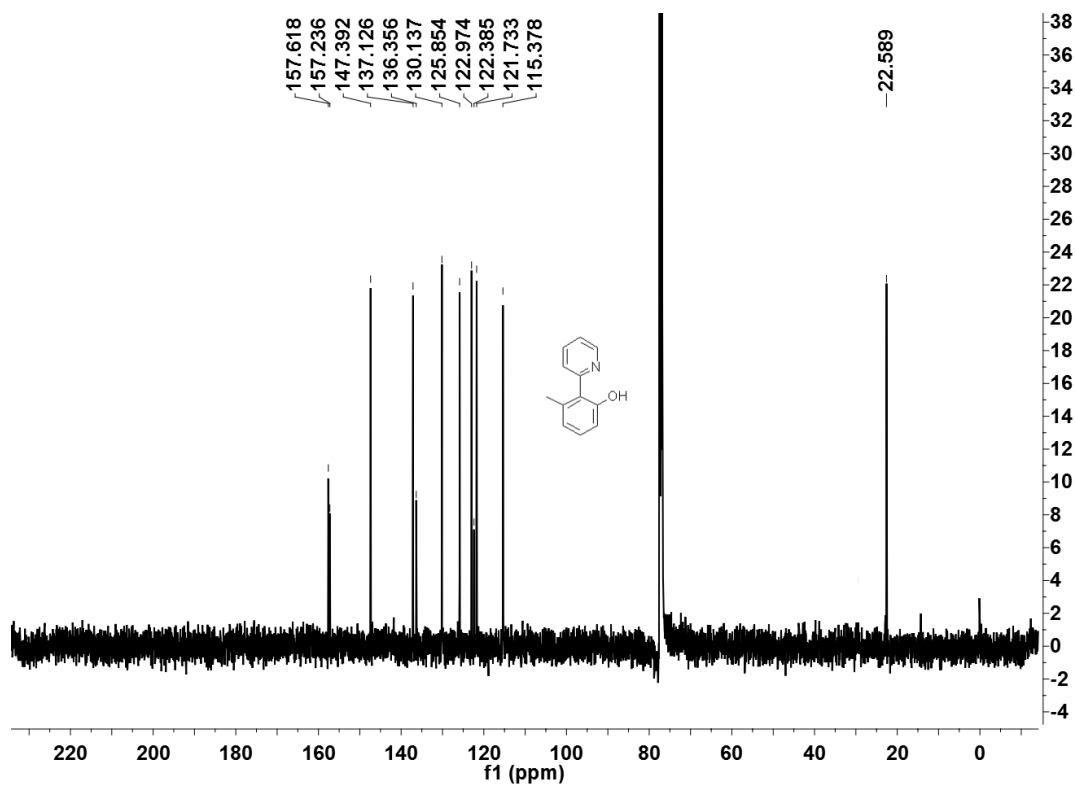

Compound **3c**

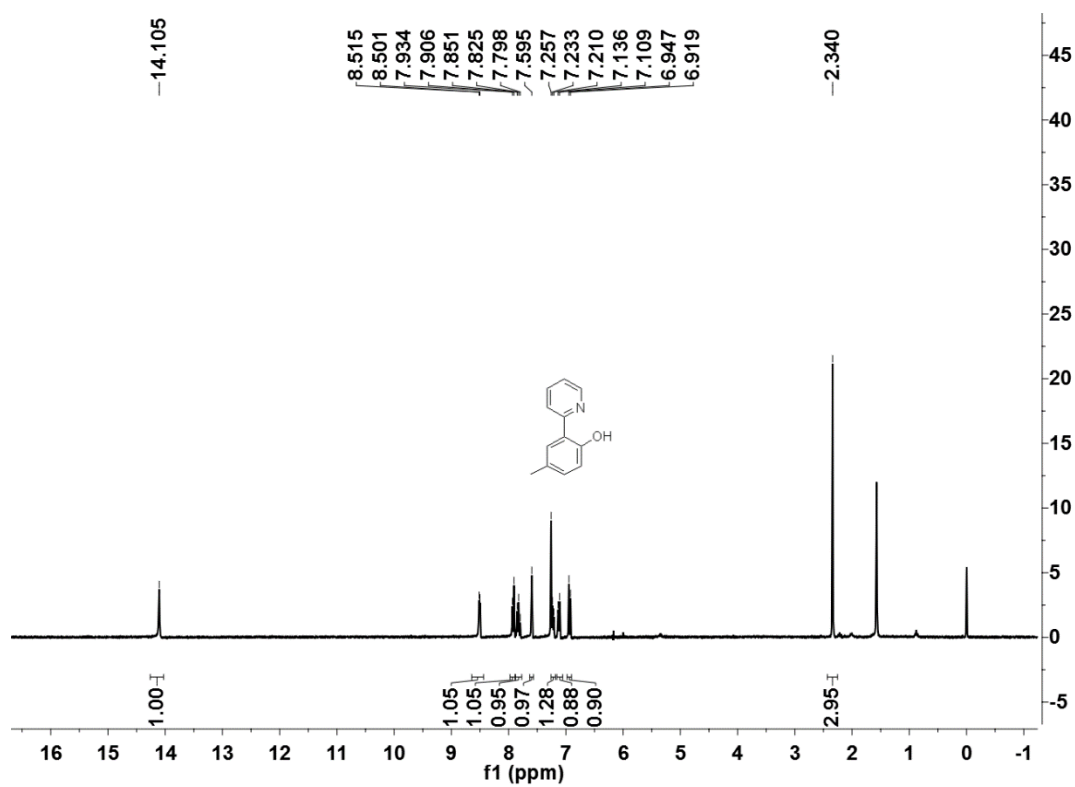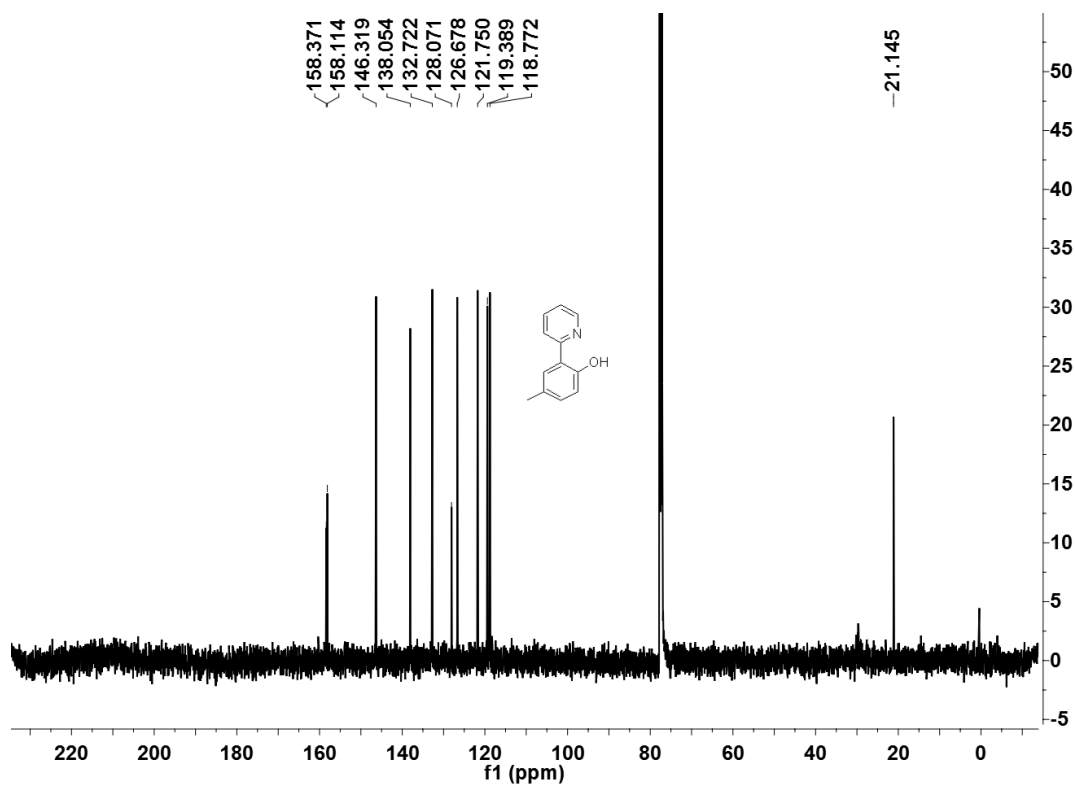

Compound **3d**

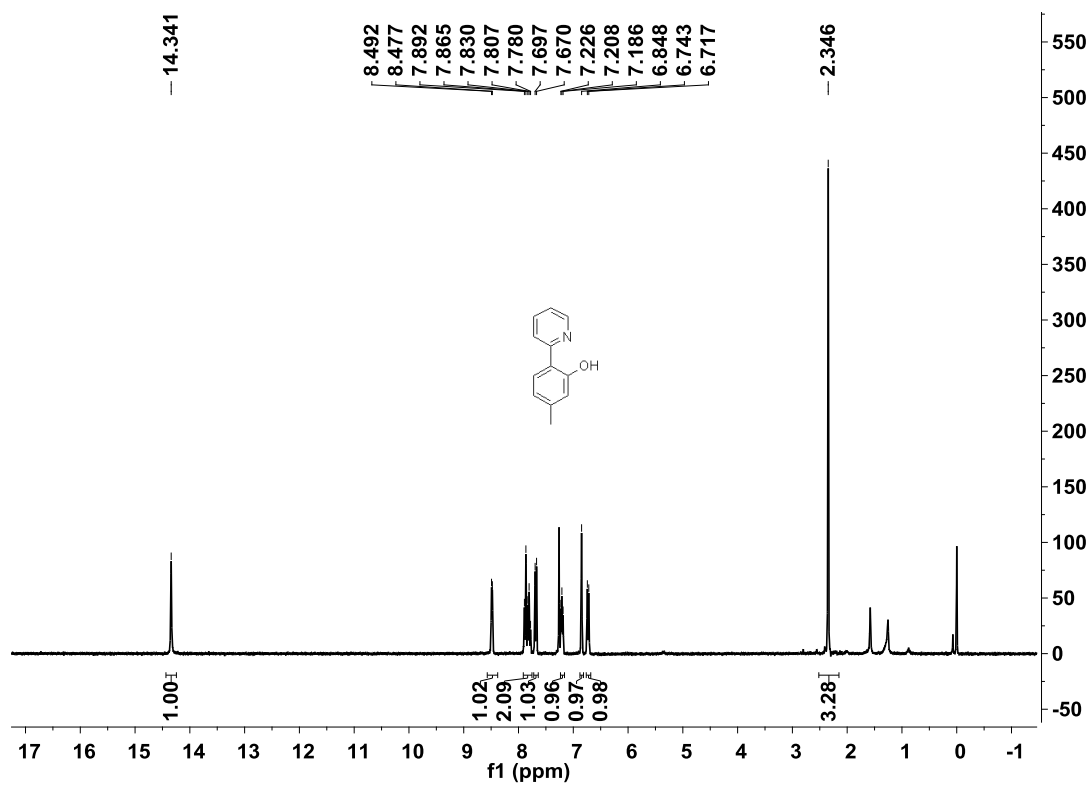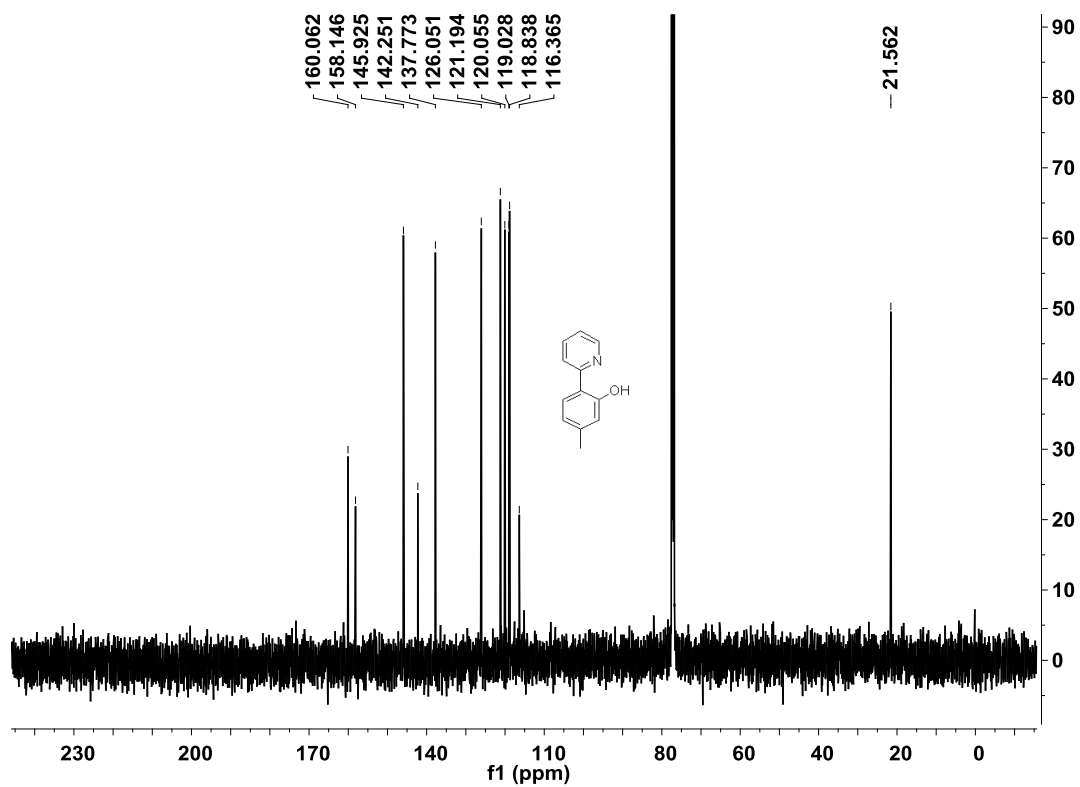

Compound **3e**

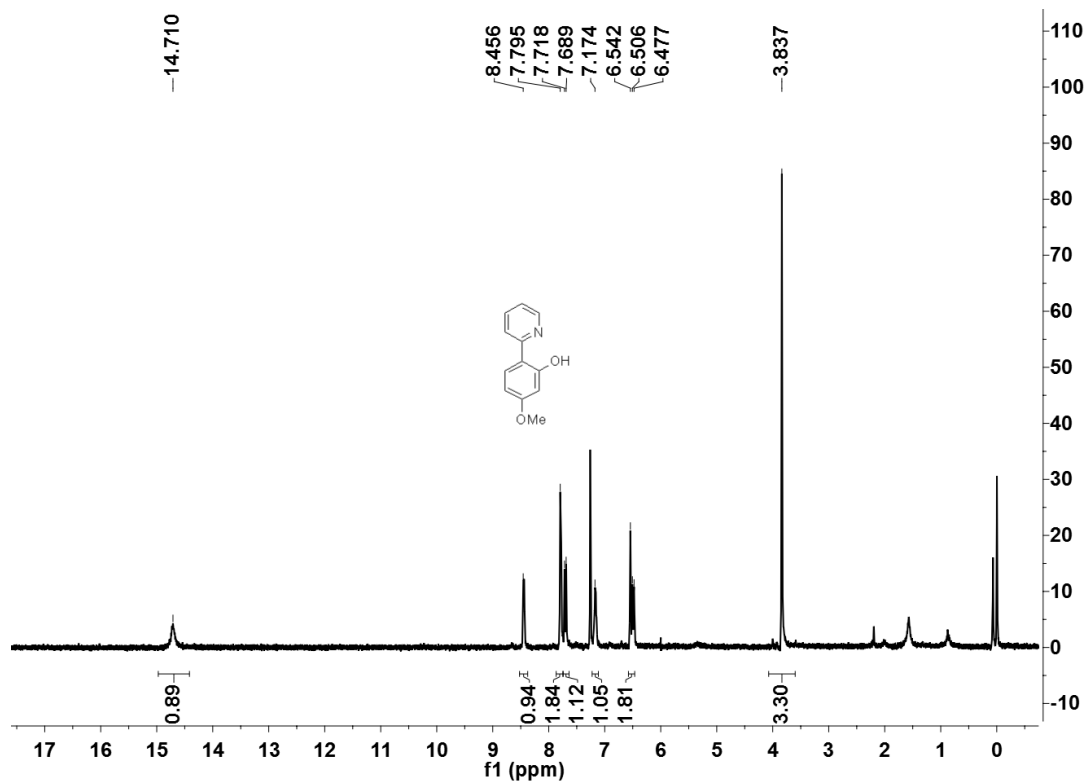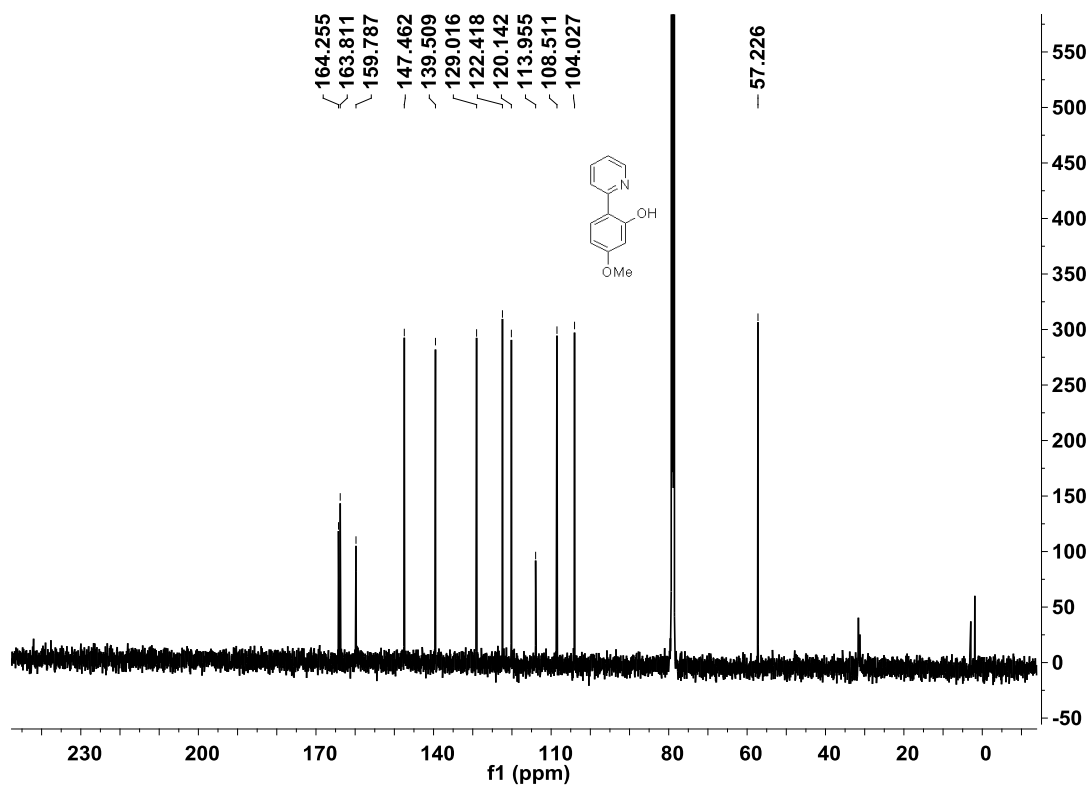

Compound **3f**

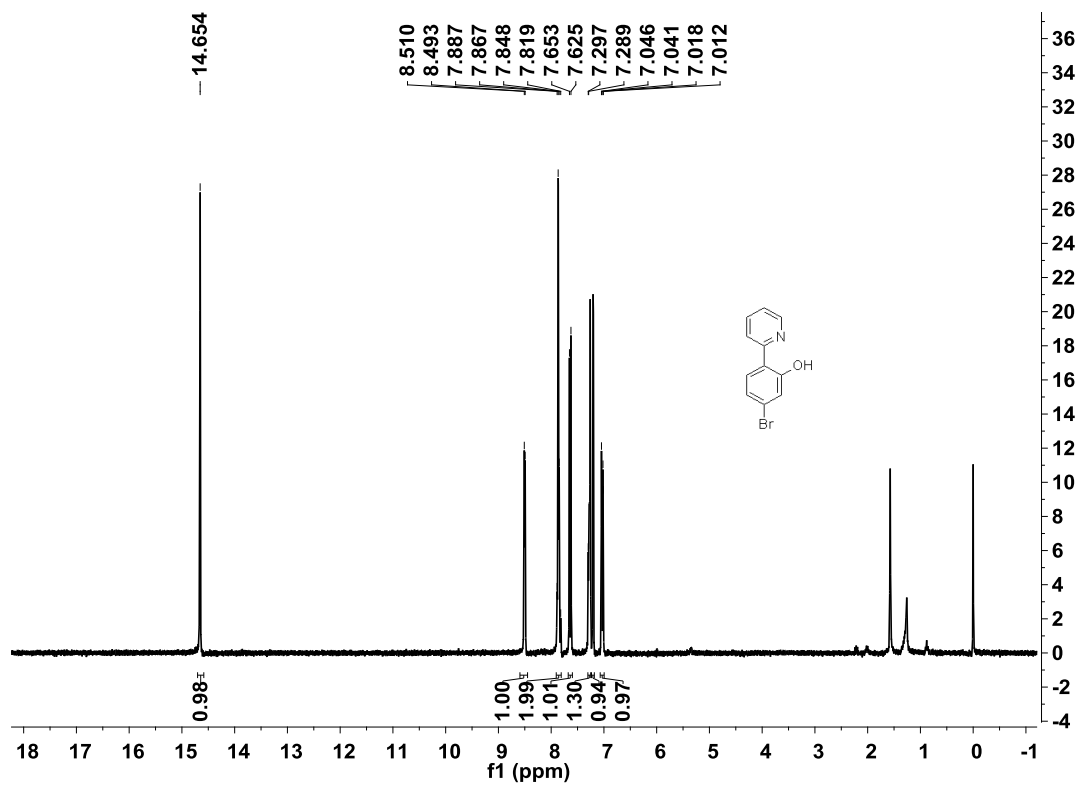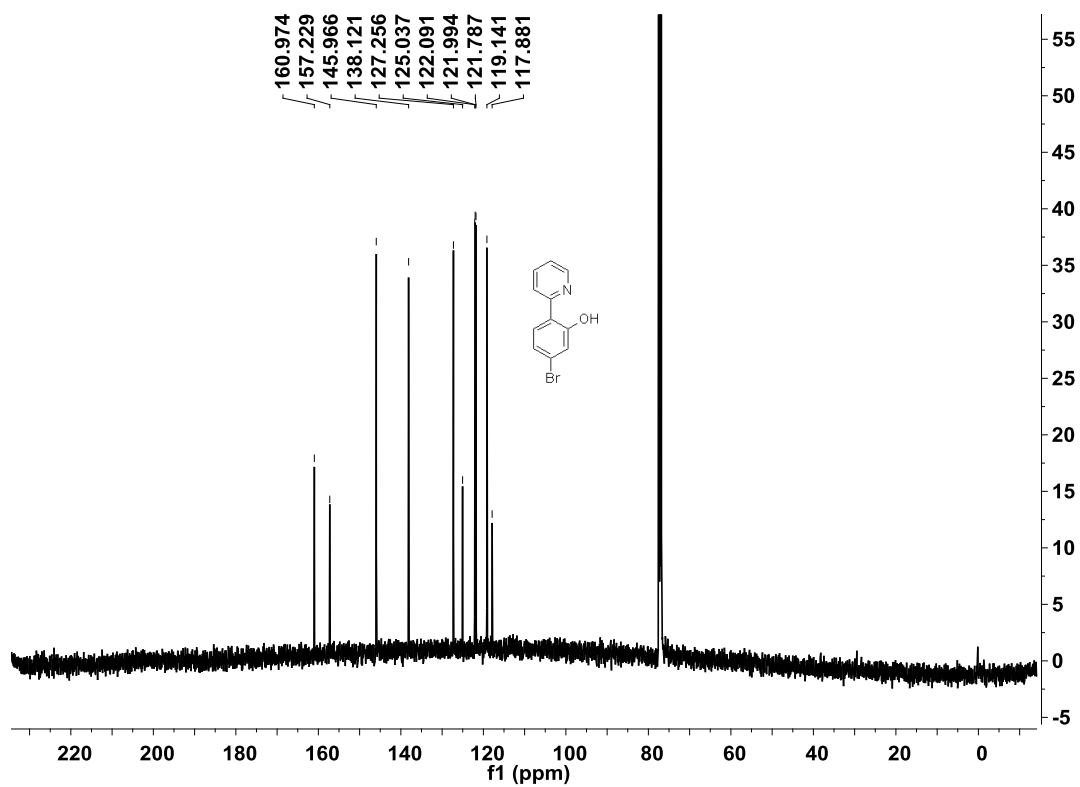

Compound **3g**

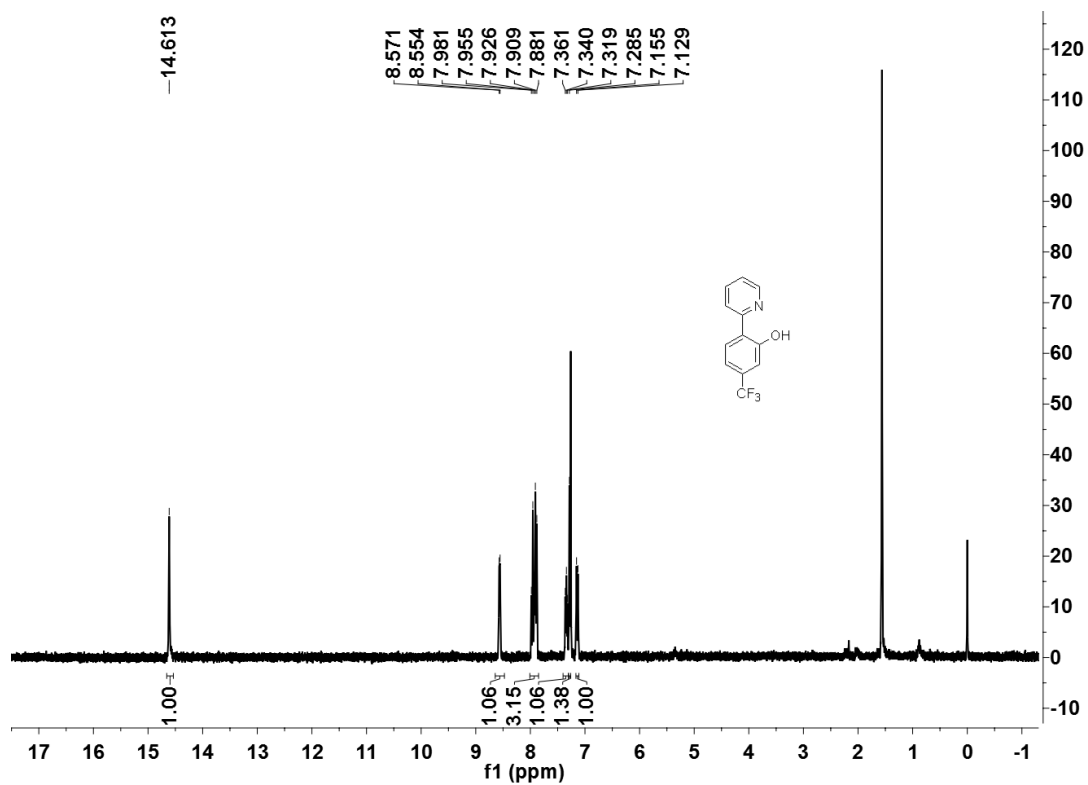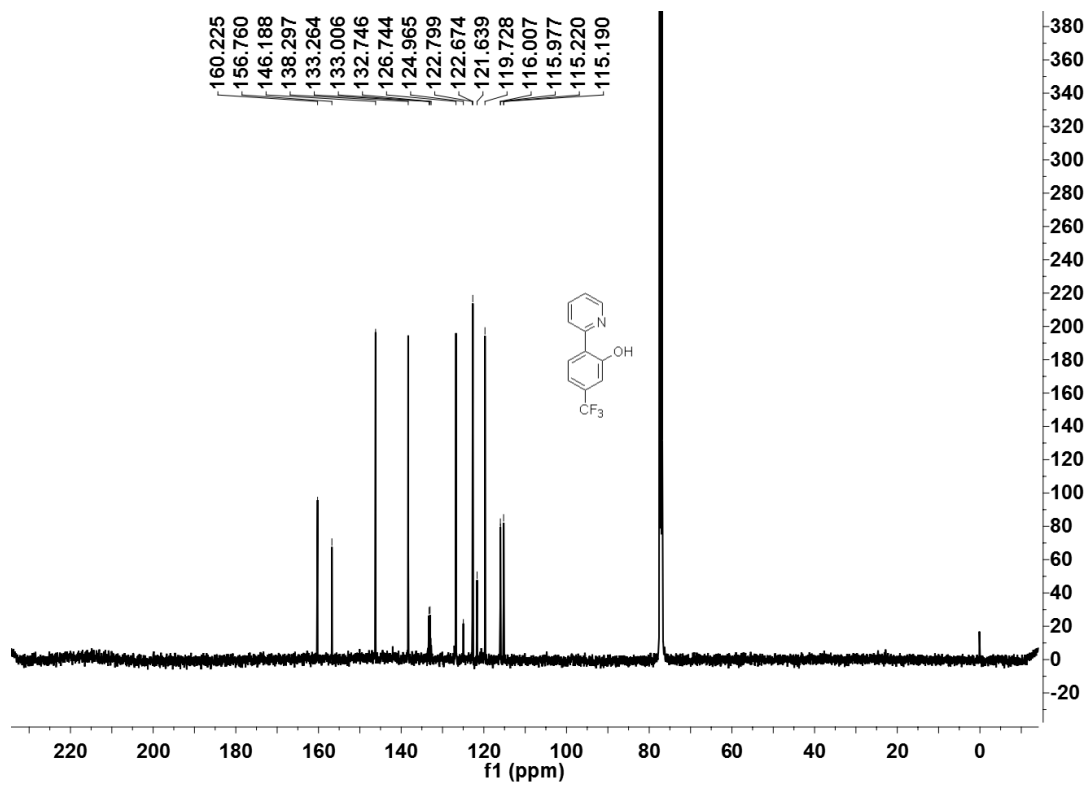

Compound **3h**

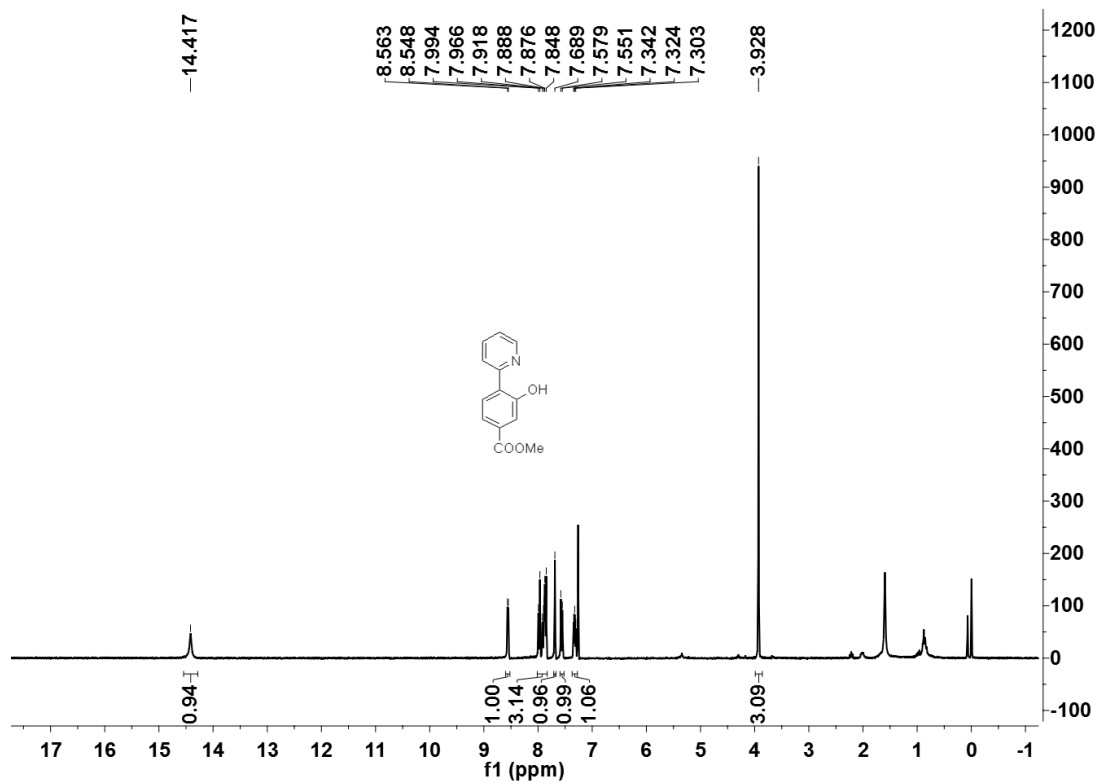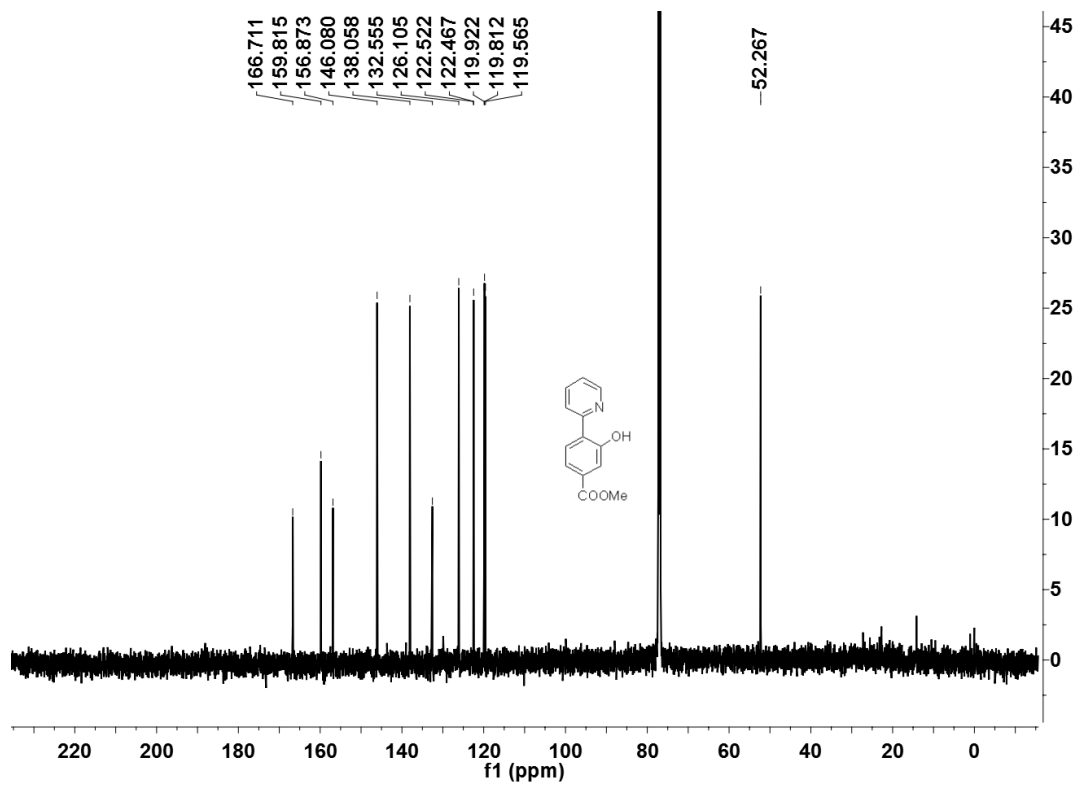

Compound **3i**

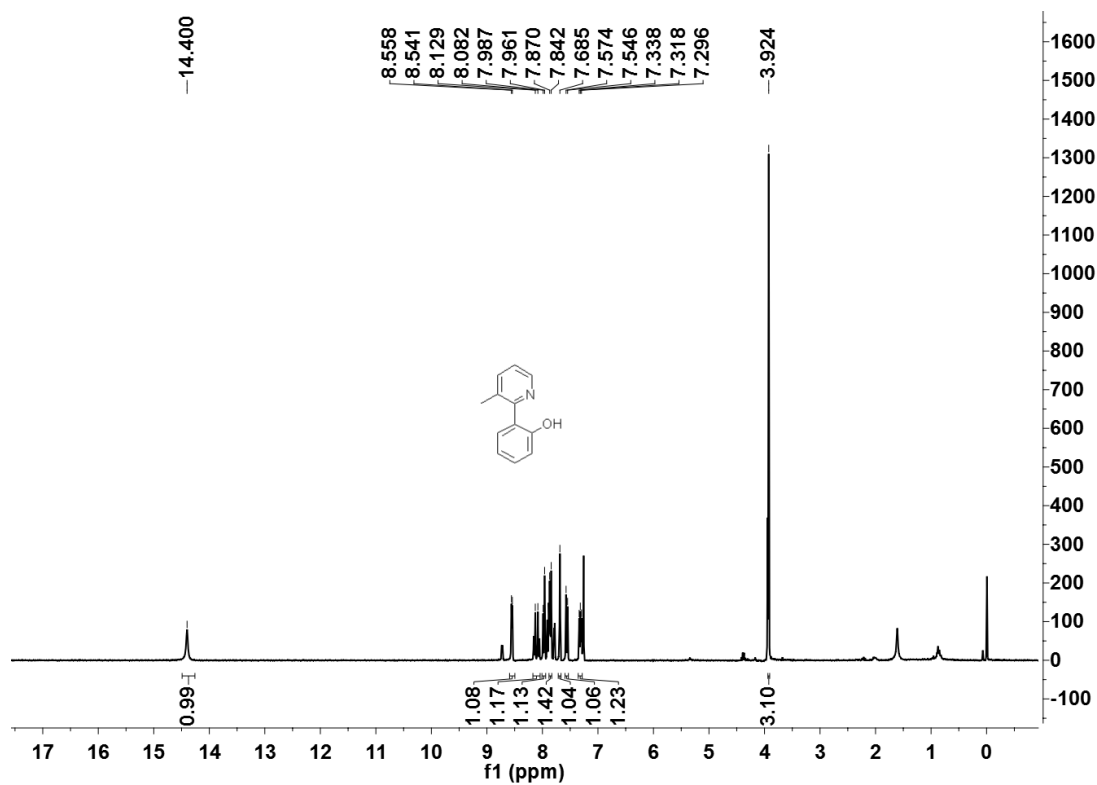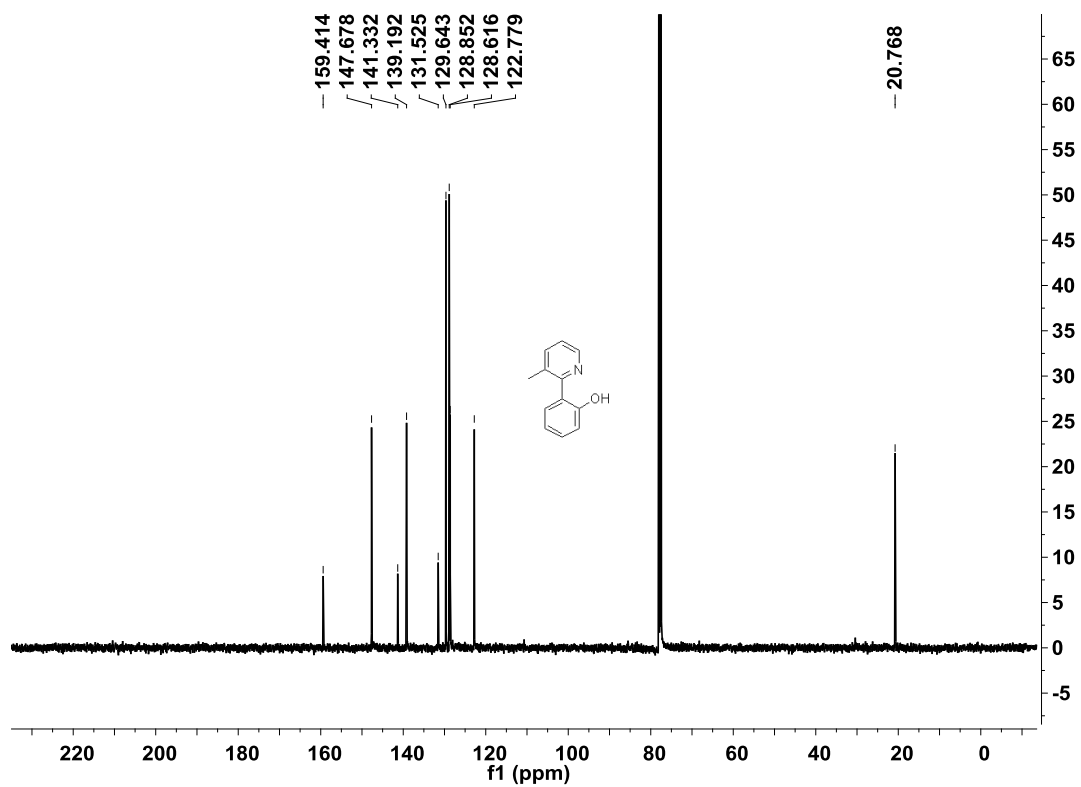



Compound **3j**

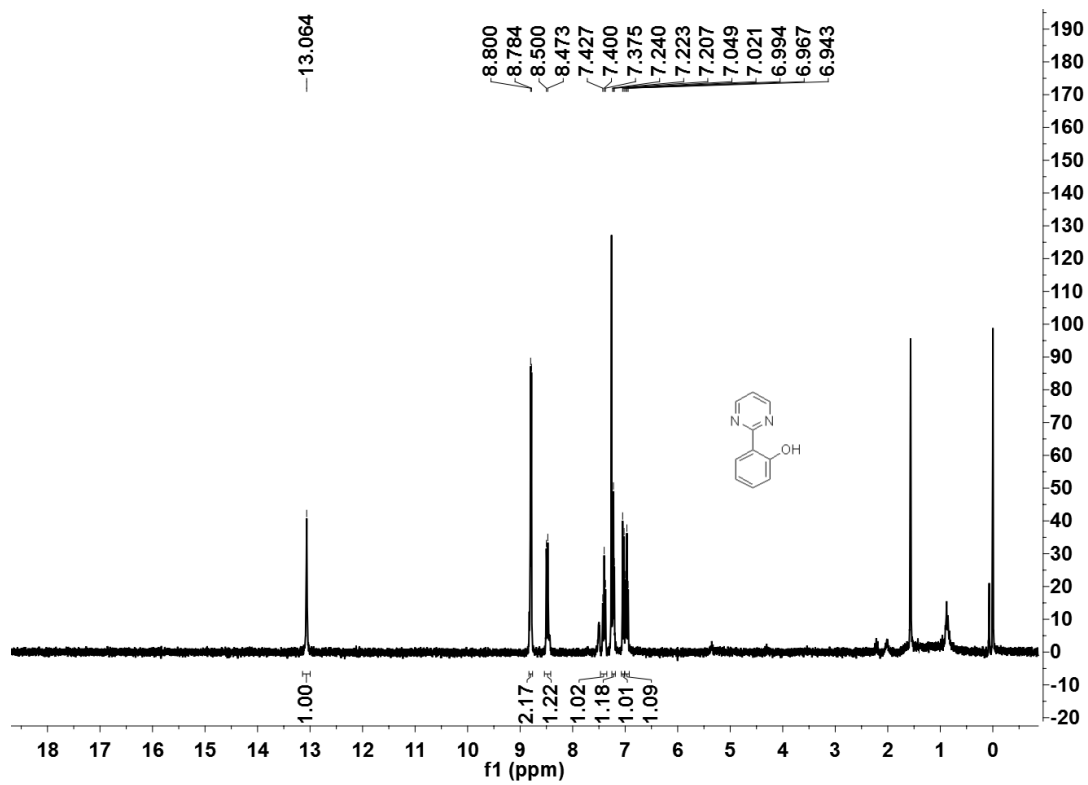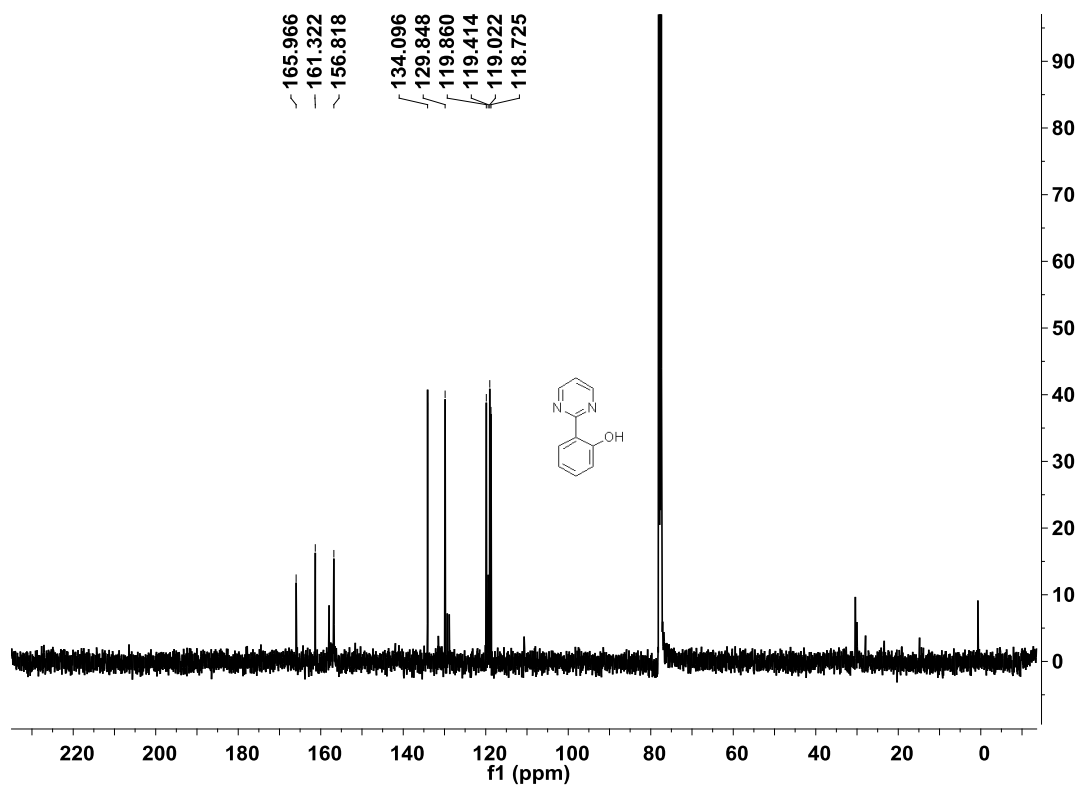

Compound **3k**

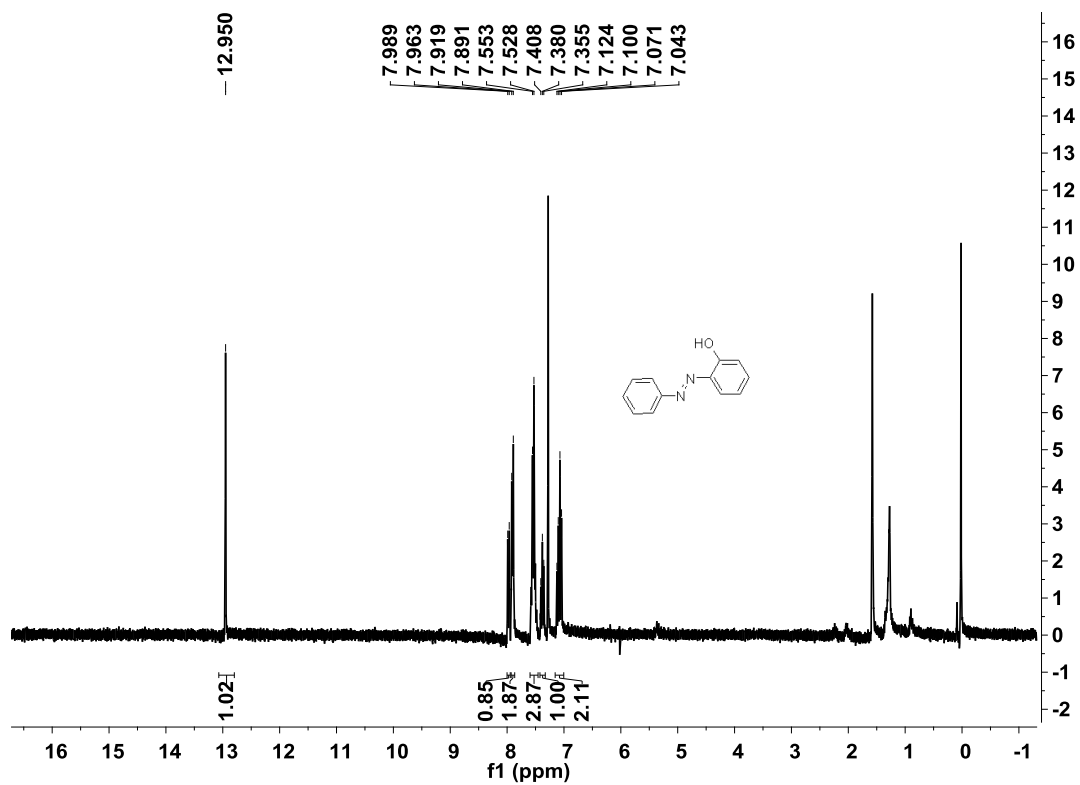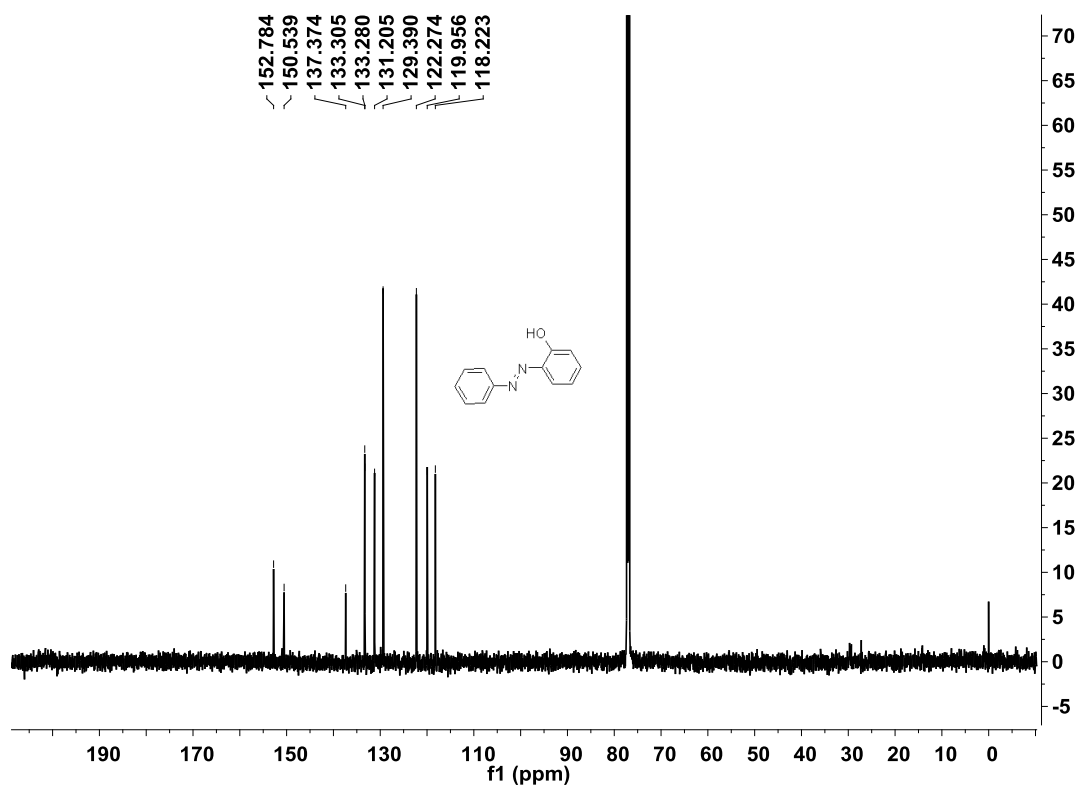

Supplement: Supplementary file 1 [file 8698624]
